# Supplementary material for: Determining the quality and complexity of next-generation sequencing data without a reference genome
Source: PubMed Central journal article supplement (PMC4298064; doi:10.1186/s13059-014-0555-3), 2014-12-17
Supplement: 13059_2014_555_MOESM1_ESM.pdf [file 13059_2014_555_MOESM1_ESM.pdf]

## **Determining the quality and complexity of next-generation sequencing data without a reference genome**

Seyed Yahya Anvar<sup>1,2,\*</sup>, Lusine Khachatryan<sup>1</sup>, Martijn Vermaat<sup>2</sup>, Michiel van Galen<sup>2</sup>, Irina Pulyakhina<sup>1</sup>, Yavuz Ariyurek<sup>2</sup>, Ken Kraaijeveld<sup>2,3</sup>, Johan T. den Dunnen<sup>1,2</sup>, Peter de Knijff<sup>1</sup>, Peter A.C. 't Hoen<sup>1,4</sup>, Jeroen F.J. Laros<sup>1,2,4,\*</sup>

<sup>1</sup> Department of Human Genetics and <sup>2</sup> Leiden Genome Technology Center, Leiden University Medical Center, Leiden, the Netherlands

<sup>3</sup> Department of Ecological Science, Section Animal Ecology, VU University Amsterdam, Amsterdam, the Netherlands

<sup>4</sup> Netherlands Bioinformatics Centre, Leiden, the Netherlands.

\* To whom correspondence should be addressed:

SYA Tel: 0031715268559; Email: [s.y.anvar@lumc.nl](mailto:s.y.anvar@lumc.nl)

JFJL Tel: 0031715269504; Email: [j.f.j.laros@lumc.nl](mailto:j.f.j.laros@lumc.nl)

## Supplementary Notes

The distribution of  $k$ -mers (DNA words of length  $k$ ) in sequencing data can provide a unique view of the complexity and quality. It has been shown that features that occur too often or too rarely reflect crucial information about the functional and structural elements of the genome of the sequenced species (1-5). Thus, the number of overrepresented sequence motifs does not disappear by increasing the  $k$  size. Many studies have shown the unimodality of the genomic  $k$ -mer spectra of most species with the exception of mammals (1). All mammals exhibit a multimodal distribution of  $k$ -mer frequencies. This feature highlights the existence of common and extremely rare features that reflect the complexity of the genome in question. The multimodality of the  $k$ -mer spectrum is independent of the genome size. Chor et al. (1) have shown that while the genome of *T. thermophila* has a comparable size (97Mb) to that of the human chromosome 12 (108Mb), the  $k$ -mer spectra differ in modality (unimodal and multimodal, respectively). The modality of the human genome is also subjected its function. Strikingly, all coding regions, including the 5' un-translated regions (UTRs) exhibit a unimodal  $k$ -mer spectrum while the introns, 3' UTRs and other intergenic regions hold a multimodal distribution (1,3). Moreover, the composition of  $k$ -mers in the spectrum is context-specific. Nullomers (missing  $k$ -mers) and rare  $k$ -mers tend to be GC-rich and often contain many CpGs (1,5). This is caused by the hypermutability of CpGs (C → T and G → A; also known as CpG suppression) that mutate at 10-20 times higher rate than other types of point mutations (5-8). In this work, we present the utility of  $k$ -mer spectrum in determining the quality and complexity of next-generation sequencing data that relies on shared and unique features across species as shown for estimating the level of relatedness between microbiomes.

### kMer Methodology

#### Index

The first step in any  $k$ -mer analysis is the generation of a profile (Figure 1A), which is constructed by the *indexing* algorithm. The efficiency of the algorithm is improved by encoding the DNA string in binary following the map given in Figure 1B. Subsequently, the binary encoded  $k$ -mers are used as the index of a count table. This can be achieved by the concatenation of the binary code for each nucleotide in a given DNA string. This procedure eliminates the need to store the actual  $k$ -mer sequences since they can be retrieved from decoding the offset in the count table. The binary code for each nucleotide is chosen in such a way that the complement of the nucleotide can be calculated using the binary NOT operator. The *indexing* algorithm returns a profile that holds observed counts for all possible substrings of length  $k$  that can be stored for other analyses.

#### Distance (*diff*)

Since the  $k$ -mer profile is in essence a vector of almost independent values, we can use any metric defined for vectors to calculate the *distance* between two profiles. We have implemented two metrics which are the standard Euclidian distance measure and the *multiset* (9) distance measure (see Formula 1). The last metric is parameterised by a function that reflects the difference between a pair. We have implemented two pairwise distance functions (shown in Formulae 2 and 3).

For a multiset  $X$ , let  $S(X)$  denote its underlying set. For multisets  $X, Y$  with  $S(X), S(Y) \subseteq \{1, 2, \dots, n\}$  we define:

(1)

$$d_f = \frac{\sum_{i=1}^n f(x_i, y_i)}{|S(X) \cup S(Y)| + 1}$$

(2) Pairwise function:

$$f_1(x, y) = \frac{|x - y|}{(x + 1)(y + 1)}$$

(3) Pairwise function:

$$f_2(x, y) = \frac{|x - y|}{x + y + 1}$$

#### Balance (*showbalance*)

When analysing sequencing data, which frequently consist of reads from both strands (e.g., due to non strand-specific sample preparation or paired-end sequencing), we can assume that the chance of observing a fragment originating from the plus and minus strands are equal. Additionally, if the sequencing depth is high enough, we expect a *balance* between the frequencies of

$k$ -mers and their reverse complement in a given  $k$ -mer profile. Every type of NGS data has an expected balance (i.e., SAGE is not expected to produce a balanced profile while whole genome shotgun sequencing is expected to have a perfectly balanced frequency between  $k$ -mers and their reverse complement). Thus,  $k$ -mer balance can indicate the quality of NGS data in respect to over-amplification, insufficient number of reads, or poor capture performance in the case of whole exome sequencing.

To calculate the balance, first we observe that every  $k$ -mer has a reverse complement. One of these is lexicographically smaller (or equal in the case of a *palindrome*) than the other. We first split a profile into two vectors,  $A = (a_0, a_1, \dots)$  and  $B = (b_0, b_1, \dots)$  where  $b_i$  represents the reverse complement of  $a_i$  and vice versa. The distance between these vectors can be calculated in the same way as described for pairwise comparison of two full  $k$ -mer profiles (Figure 1C).

Additionally, kMer can forcefully balance the  $k$ -mer profiles (if desired) by adding the values of each  $k$ -mer to its reverse complement. This procedure can improve distance calculation if the sequencing depth is too low.

### Shrink

A profile indexed at a certain  $k$  size contains information about  $k$ -mers of smaller lengths. This can be seen from the fact that a word  $w$  over an alphabet  $\mathcal{A}$  has  $|\mathcal{A}|$  possible suffixes of length one. To calculate the number of occurrences of  $w$ , we simply need to calculate the  $\sum_{i \in \mathcal{A}} \text{count}(w \cdot i)$ . This only holds when  $k$  is relatively small compared to the length of the indexed sequencing reads. Indeed, if a sequence of length  $\ell$  is indexed at length  $k$ , then  $(\ell - k + 1)$   $k$ -mers are encountered per sequence. However, shrinking of a profile will yield  $(\ell - k)$   $k$ -mers. Usually, this border effect is small enough to ignore, but should be taken into consideration when indexing large amounts of small (approaching length  $k$ ) sequences. Shrinking is useful when trying to estimate the best  $k$  for a particular purpose. One can start with choosing a relatively large  $k$  and then reuse the generated profile to construct a profile of smaller  $k$  sizes (Figure 1D).

### Smoothing

Ideally, the samples that are used to generate profiles are sequenced with the same sample preparation, on the same platform, and most importantly at sufficient depth. However, in practice, this is rarely the case. When two similar samples are sequenced at insufficient depth, it will be reflected in a  $k$ -mer profile by zero counts for  $k$ -mers that are not expected to be nullomers. While this is not a problem in itself, the fact that most sequencing procedures have a random selection of sequencing fragments will result in a random distribution of these zero counts. When comparing two profiles, the pairwise distances will be artificially large. Scaling the profiles can partially compensate for differences in the sequencing depth but can not account for nullomers since no distinction can be made between true missing words and artificially missing words. An obvious solution would be to shrink the profile until nullomers are removed. This method is valid as long as all zero counts reflect artificial nullomers. Otherwise, shrinking will reduce the specificity and does not reflect the true complexity of the sequenced genome. To deal with this problem, we have developed the *pairwise smoothing* function. This method locally shrinks a profile only when necessary. In this way, we retain information if it is available in both profiles and discard missing data (Figure 1E).

Let  $P$  and  $Q$  be sub-profiles of words over an alphabet  $\mathcal{A}$  of length  $\ell$  (with  $\ell$  dividable by  $|\mathcal{A}|$ ). Let  $t$  be a user-defined threshold and let  $f$  be a method of summarizing a profile. If  $\min(f(P), f(Q)) > t$  we divide the profiles in  $|\mathcal{A}|$  equal parts and recursively repeat the procedure for each part. If this is not the case, we collapse both  $P$  and  $Q$  to one word. Implemented methods of summarizing are minimum, mean, and median. In Figure 1E we show an example of how smoothing might work. We have chosen  $f = \text{min}$  and  $t = 0$  as default parameters. With this method, we can index a dataset with a large  $k$  and retain the overall specificity of the profile since this method can automatically select the optimal choice of  $k$  locally.

Below, we provide an overview of all functions of kMer that are available via the command line interface:

| Function           | Description                                                                   |
|--------------------|-------------------------------------------------------------------------------|
| <i>index</i>       | Make a profile from a FASTA file                                              |
| <i>merge</i>       | Merge two profiles                                                            |
| <i>balance</i>     | Balance a profile on the frequency of $k$ -mers and their reverse complements |
| <i>showbalance</i> | Calculate the balance of a profile                                            |
| <i>meanstd</i>     | Show the mean and standard deviation of $k$ -mer frequencies                  |
| <i>distr</i>       | Calculate the distribution of the frequencies in a profile                    |
| <i>info</i>        | Print basic statistics on a given profile                                     |
| <i>getcount</i>    | Retrieve the count for a particular $k$ -mer                                  |
| <i>positive</i>    | Only keep counts that are positive in both profiles                           |
| <i>scale</i>       | Scale profiles such that the total number of $k$ -mer frequencies is equal    |
| <i>shrink</i>      | Shrink a profile, effectively educing $k$ size                                |
| <i>shuffle</i>     | Randomise a profile                                                           |
| <i>smooth</i>      | Smooth two profiles by collapsing sub-profiles                                |
| <i>diff</i>        | Calculate the distance between two profiles                                   |
| <i>matrix</i>      | Make a pairwise distance matrix for a series of $k$ -mer profiles             |

**Supplementary Table 1** – An overview and basic statistics on NGS data.

| ID                                        | Protocol Code | Total Reads | Alignment (%) | Duplication (%) | Prop. Pairs (%) | Discordant (%) | On Target (%) |
|-------------------------------------------|---------------|-------------|---------------|-----------------|-----------------|----------------|---------------|
| <b>Whole Genome Sequencing (WGS) data</b> |               |             |               |                 |                 |                |               |
| FG1_F4L1_P2                               | Protocol 2    | 446654194   | 99.88         | 2.85            | 95.85           | 2.04           | NA            |
| FG1_F4L2_P2                               | Protocol 2    | 243872592   | 99.87         | 2.01            | 95.89           | 2.03           | NA            |
| FG1_F1L1_P1                               | Protocol 1    | 117691658   | 99.59         | 2.27            | 83.41           | 13.53          | NA            |
| FG1_F1L2_P1                               | Protocol 1    | 122955824   | 99.59         | 2.35            | 83.38           | 13.56          | NA            |
| FG1_F1L3_P1                               | Protocol 1    | 108288914   | 99.59         | 2.11            | 83.45           | 13.50          | NA            |
| FG2_F4L2_P2                               | Protocol 2    | 199745404   | 99.87         | 1.85            | 95.07           | 2.69           | NA            |
| FG2_F4L3_P2                               | Protocol 2    | 411392680   | 99.87         | 3.00            | 95.03           | 2.71           | NA            |
| FG2_F1L4_P1                               | Protocol 1    | 129056860   | 99.61         | 1.84            | 85.26           | 11.89          | NA            |
| FG2_F1L5_P1                               | Protocol 1    | 127011660   | 99.63         | 1.81            | 85.28           | 11.87          | NA            |
| FG2_F1L6_P1                               | Protocol 1    | 132618524   | 99.63         | 1.87            | 85.27           | 11.89          | NA            |
| FG3_F1L7_P1                               | Protocol 1    | 118035394   | 99.56         | 1.94            | 84.18           | 12.84          | NA            |
| FG3_F1L8_P1                               | Protocol 1    | 122261090   | 99.60         | 2.03            | 84.24           | 12.81          | NA            |
| FG3_F4L4_P2                               | Protocol 2    | 428887478   | 99.88         | 2.89            | 96.09           | 1.71           | NA            |
| FG4_F2L2_P1                               | Protocol 1    | 129062580   | 99.72         | 1.74            | 87.46           | 9.93           | NA            |
| FG4_F2L3_P1                               | Protocol 1    | 123029712   | 99.70         | 1.69            | 87.46           | 9.92           | NA            |
| FG4_F2L4_P1                               | Protocol 1    | 122774394   | 99.67         | 1.70            | 87.39           | 9.90           | NA            |
| FG4_F2L2_P2                               | Protocol 2    | 288710022   | 99.86         | 2.30            | 95.40           | 2.04           | NA            |
| FG4_F2L3_P2                               | Protocol 2    | 280581930   | 99.86         | 2.27            | 95.39           | 2.05           | NA            |
| FG4_F2L4_P2                               | Protocol 2    | 270864574   | 99.85         | 2.25            | 95.38           | 2.04           | NA            |
| FG5_F2L5_P2                               | Protocol 2    | 285364738   | 99.87         | 1.90            | 96.53           | 1.59           | NA            |
| FG5_F2L6_P2                               | Protocol 2    | 275417304   | 99.86         | 1.87            | 96.47           | 1.61           | NA            |
| FG5_F2L7_P2                               | Protocol 2    | 279423494   | 99.86         | 1.93            | 96.49           | 1.59           | NA            |
| FG5_F2L5_P1                               | Protocol 1    | 133079914   | 99.76         | 1.84            | 91.87           | 5.95           | NA            |
| FG5_F2L6_P1                               | Protocol 1    | 129077350   | 99.76         | 1.82            | 91.82           | 5.98           | NA            |
| FG5_F2L7_P1                               | Protocol 1    | 131237400   | 99.75         | 1.83            | 91.89           | 5.91           | NA            |
| FG6_F3L1_P2                               | Protocol 2    | 296508646   | 99.71         | 2.58            | 95.25           | 2.56           | NA            |
| FG6_F3L2_P2                               | Protocol 2    | 286834464   | 99.70         | 2.54            | 95.25           | 2.56           | NA            |
| FG6_F2L8_P2                               | Protocol 2    | 271555116   | 99.85         | 2.52            | 95.44           | 2.52           | NA            |
| FG6_F3L1_P1                               | Protocol 1    | 65996740    | 99.23         | 1.68            | 87.50           | 9.59           | NA            |
| FG6_F3L2_P1                               | Protocol 1    | 65390164    | 99.14         | 1.67            | 87.41           | 9.60           | NA            |
| FG6_F2L8_P1                               | Protocol 1    | 63421100    | 99.69         | 1.66            | 87.91           | 9.64           | NA            |
| FG7_F3L3_P2                               | Protocol 2    | 302013082   | 99.82         | 2.19            | 96.18           | 1.81           | NA            |
| FG7_F3L4_P2                               | Protocol 2    | 295235714   | 99.82         | 2.16            | 96.18           | 1.81           | NA            |
| FG7_F3L5_P2                               | Protocol 2    | 303851942   | 99.83         | 2.18            | 96.20           | 1.81           | NA            |
| FG7_F3L3_P1                               | Protocol 1    | 108774848   | 99.56         | 1.83            | 81.72           | 15.32          | NA            |
| FG7_F3L4_P1                               | Protocol 1    | 107269844   | 99.56         | 1.81            | 81.70           | 15.34          | NA            |
| FG7_F3L5_P1                               | Protocol 1    | 109243670   | 99.58         | 1.83            | 81.75           | 15.30          | NA            |
| FG8_F3L6_P2                               | Protocol 2    | 243965640   | 99.80         | 1.68            | 95.97           | 2.13           | NA            |
| FG8_F3L7_P2                               | Protocol 2    | 278758454   | 99.80         | 1.82            | 95.96           | 2.13           | NA            |
| FG8_F3L8_P2                               | Protocol 2    | 287101398   | 99.79         | 1.84            | 95.96           | 2.12           | NA            |
| FG8_F3L6_P1                               | Protocol 1    | 64415080    | 99.61         | 1.07            | 87.47           | 9.99           | NA            |
| FG8_F3L7_P1                               | Protocol 1    | 73986900    | 99.60         | 1.19            | 87.44           | 10.00          | NA            |
| FG8_F3L8_P1                               | Protocol 1    | 75888242    | 99.54         | 1.21            | 87.43           | 9.98           | NA            |
| FG9_F5L5_P2                               | Protocol 2    | 234767462   | 99.84         | 1.96            | 95.98           | 1.84           | NA            |
| FG9_F5L6_P2                               | Protocol 2    | 236372176   | 99.83         | 1.97            | 95.98           | 1.84           | NA            |
| FG9_F5L7_P2                               | Protocol 2    | 230093402   | 99.83         | 1.93            | 95.96           | 1.85           | NA            |
| FG9_F5L5_P1                               | Protocol 1    | 140145696   | 99.72         | 1.96            | 90.57           | 6.94           | NA            |
| FG9_F5L6_P1                               | Protocol 1    | 141026172   | 99.71         | 1.96            | 90.57           | 6.93           | NA            |
| FG9_F5L7_P1                               | Protocol 1    | 137203932   | 99.71         | 1.92            | 90.55           | 6.94           | NA            |
| <b>Whole Exome Sequencing (WES) data</b>  |               |             |               |                 |                 |                |               |
| WE01_F1L1_NIM                             | Nimblegen     | 83259226    | 99.41         | 30.79           | 87.69           | 6.44           | 4.10          |
| WE02_F1L1_NIM                             | Nimblegen     | 77084010    | 99.45         | 20.22           | 91.95           | 3.65           | 4.54          |
| WE03_F1L1_NIM                             | Nimblegen     | 68285448    | 99.55         | 63.90           | 87.85           | 6.62           | 4.25          |
| WE04_F1L2_NIM                             | Nimblegen     | 56284428    | 99.48         | 58.44           | 85.26           | 7.95           | 5.15          |
| WE05_F1L2_NIM                             | Nimblegen     | 64156718    | 99.42         | 58.02           | 92.53           | 3.49           | 5.79          |
| WE06_F1L2_NIM                             | Nimblegen     | 77582290    | 99.34         | 56.53           | 89.79           | 4.97           | 5.74          |
| WE07_F1L2_NIM                             | Nimblegen     | 56579026    | 99.39         | 33.44           | 91.55           | 4.03           | 5.75          |
| WE08_F1L2_NIM                             | Nimblegen     | 89899166    | 99.47         | 33.03           | 92.37           | 3.59           | 5.37          |
| WE09_F1L2_NIM                             | Nimblegen     | 64436078    | 99.47         | 52.28           | 89.41           | 5.51           | 5.80          |
| WE10_F1L3_NIM                             | Nimblegen     | 86560130    | 99.33         | 80.35           | 77.81           | 12.22          | 3.69          |
| WE11_F1L3_NIM                             | Nimblegen     | 92930912    | 99.55         | 41.64           | 91.81           | 4.29           | 5.73          |
| WE12_F2L1_AGI                             | Agilent       | 37132998    | 99.76         | 25.64           | 99.26           | 0.13           | 73.91         |
| WE13_F2L2_AGI                             | Agilent       | 59463000    | 99.79         | 38.79           | 99.12           | 0.16           | 72.78         |
| WE14_F2L1_AGI                             | Agilent       | 39026800    | 99.71         | 11.10           | 99.25           | 0.14           | 73.00         |
| WE15_F2L2_AGI                             | Agilent       | 66249084    | 99.7          | 33.87           | 99.13           | 0.18           | 72.34         |
| WE16_F2L2_AGI                             | Agilent       | 38263608    | 99.79         | 14.96           | 99.18           | 0.19           | 71.47         |
| WE17_F2L1_AGI                             | Agilent       | 35598044    | 99.74         | 10.23           | 99.25           | 0.14           | 72.56         |
| WE18_F2L2_AGI                             | Agilent       | 55952210    | 99.79         | 13.36           | 99.29           | 0.11           | 72.25         |
| WE19_F2L1_AGI                             | Agilent       | 22641360    | 99.73         | 8.38            | 98.99           | 0.12           | 72.75         |

|               |           |           |       |       |       |      |       |
|---------------|-----------|-----------|-------|-------|-------|------|-------|
| WE20_F2L1_AGI | Agilent   | 37199940  | 99.77 | 14.16 | 99.12 | 0.37 | 73.73 |
| WE21_F3L1_NIM | Nimblegen | 150724496 | 98.98 | 12.60 | 91.74 | 4.40 | 32.29 |
| WE22_F3L1_NIM | Nimblegen | 37265636  | 98.99 | 43.41 | 90.65 | 0.84 | 40.41 |
| WE23_F3L1_NIM | Nimblegen | 26184756  | 98.97 | 17.19 | 92.89 | 1.77 | 42.40 |
| WE24_F2L2_AGI | Agilent   | 72841656  | 99.78 | 16.13 | 99.21 | 0.20 | 71.46 |
| WE25_F2L1_AGI | Agilent   | 37493898  | 99.72 | 16.51 | 99.06 | 0.21 | 74.07 |
| WE26_F2L1_AGI | Agilent   | 40715928  | 99.75 | 22.49 | 98.99 | 0.42 | 72.24 |
| WE27_F2L2_AGI | Agilent   | 46221708  | 99.75 | 24.41 | 99.22 | 0.17 | 73.91 |
| WE28_F2L2_AGI | Agilent   | 63970074  | 99.75 | 26.20 | 99.24 | 0.14 | 72.82 |
| WE29_F2L1_AGI | Agilent   | 40170162  | 99.75 | 15.01 | 99.08 | 0.10 | 73.22 |
| WE30_F3L1_NIM | Nimblegen | 101770558 | 99.42 | 20.03 | 96.31 | 0.39 | 61.51 |
| WE31_F3L1_NIM | Nimblegen | 123446142 | 99.38 | 15.90 | 96.73 | 0.37 | 62.20 |
| WE32_F4L1_NIM | Nimblegen | 26271934  | 99.48 | 18.76 | 96.14 | 2.19 | 62.16 |
| WE33_F4L1_NIM | Nimblegen | 39446618  | 99.4  | 38.43 | 96.53 | 1.50 | 59.55 |
| WE34_F4L1_NIM | Nimblegen | 46648798  | 99.35 | 28.97 | 96.83 | 0.93 | 62.13 |
| WE35_F4L1_NIM | Nimblegen | 65861096  | 99.47 | 18.77 | 93.99 | 2.65 | 43.11 |
| WE36_F4L1_NIM | Nimblegen | 34564376  | 99.02 | 39.88 | 95.63 | 1.70 | 58.61 |
| WE37_F4L1_NIM | Nimblegen | 53798832  | 99.39 | 28.24 | 97.36 | 1.05 | 62.07 |

#### RNA-Seq data

Please refer to 't Hoen et al. and Lappalainen et al. for the detailed list of statistics (10,11).

---



|           |           |           |           |           |           |           |           |           |
|-----------|-----------|-----------|-----------|-----------|-----------|-----------|-----------|-----------|
| NC_017190 | NC_017190 | NC_017190 | NC_017190 | NC_017190 | NC_017190 | NC_017190 | NC_017190 | NC_017190 |
| NC_018089 | NC_018089 | NC_018089 | NC_018089 | NC_018089 | NC_018089 | NC_018089 | NC_018089 | NC_018089 |
| NC_017195 | NC_017195 | NC_017195 | NC_017195 | NC_017195 | NC_017195 | NC_017195 | NC_017195 | NC_017195 |
| NC_013315 | NC_013315 | NC_013315 | NC_013315 | NC_013315 | NC_013315 | NC_013315 | NC_013315 | NC_013315 |
| NC_017299 | NC_017299 | NC_017299 | NC_017299 | NC_017299 | NC_017299 | NC_017299 | NC_017299 | NC_017299 |
| NC_017304 | NC_017304 | NC_017304 | NC_017304 | NC_017304 | NC_017304 | NC_017304 | NC_017304 | NC_017304 |
| NC_017295 | NC_017295 | NC_017295 | NC_017295 | NC_017295 | NC_017295 | NC_017295 | NC_017295 | NC_017295 |
| NC_002953 | NC_002953 | NC_002953 | NC_002953 | NC_002953 | NC_002953 | NC_002953 | NC_002953 | NC_002953 |

---

Please note that gut and right palm microbiomes were obtained from Caporaso et al (12).

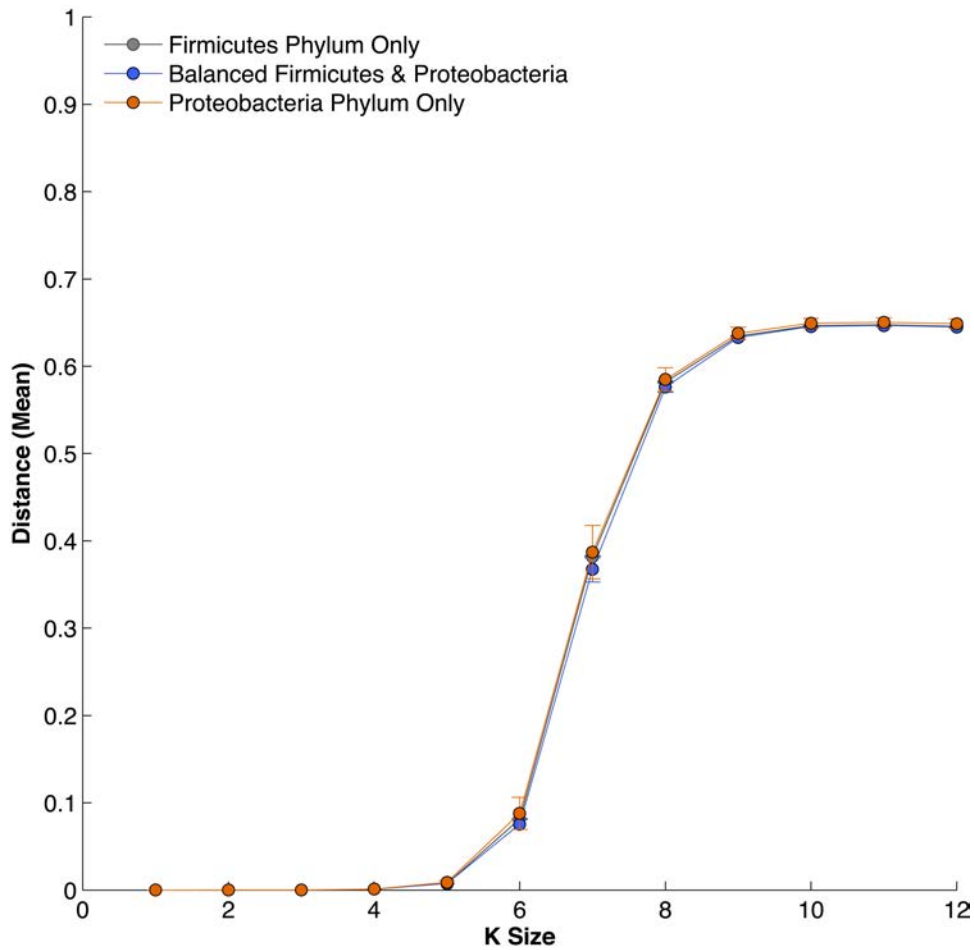

**Supplementary Figure 1 – The optimal choice of  $k$ .** The distance of three metagenomes that consist of 30 genomes from the *Firmicutes* phylum, 30 genomes selected from *Firmicutes* and *Proteobacteria* phyla, and 30 genomes from the *Proteobacteria* phylum were measured from 10 random permutations (without changing the overall nucleotide composition) based on different  $k$  sizes, ranging from 1 to 12. Data points depict the median distance between each metagenome and its corresponding permuted sets. Bars indicate the standard deviation.



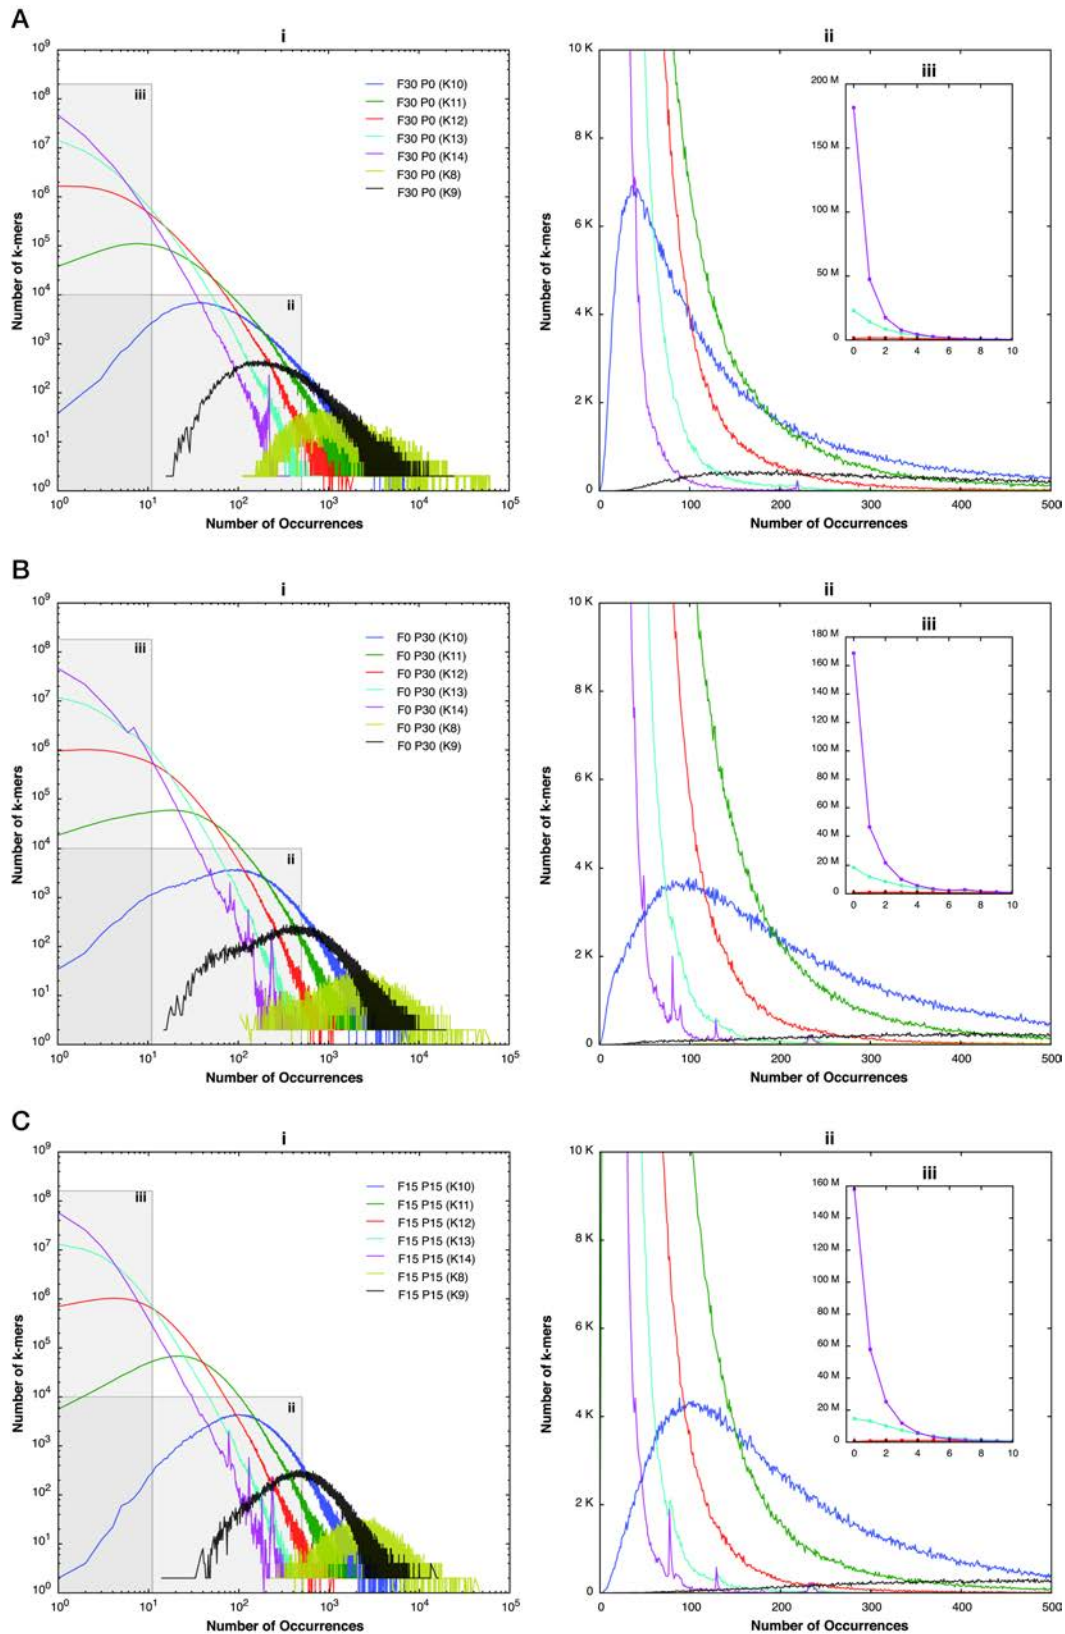

**Supplementary Figure 2 – The  $k$ -mer spectrum of modelled metagenomes.** **A)** The  $k$ -mer spectrum of metagenome consisting of 30 species from the *Firmicutes* phylum. The  $k$  size ranges from 8 to 14, coloured accordingly. The full spectrum is depicted in panel **i** (left panel), and two zoomed in plots (**ii** and **iii**) are provided on the right. **B)** The  $k$ -mer spectrum of metagenome consisting of 30 species from the *Proteobacteria* phylum. **C)** The  $k$ -mer spectrum of metagenome consisting of 30 species from the *Firmicutes* and *Proteobacteria* phyla.

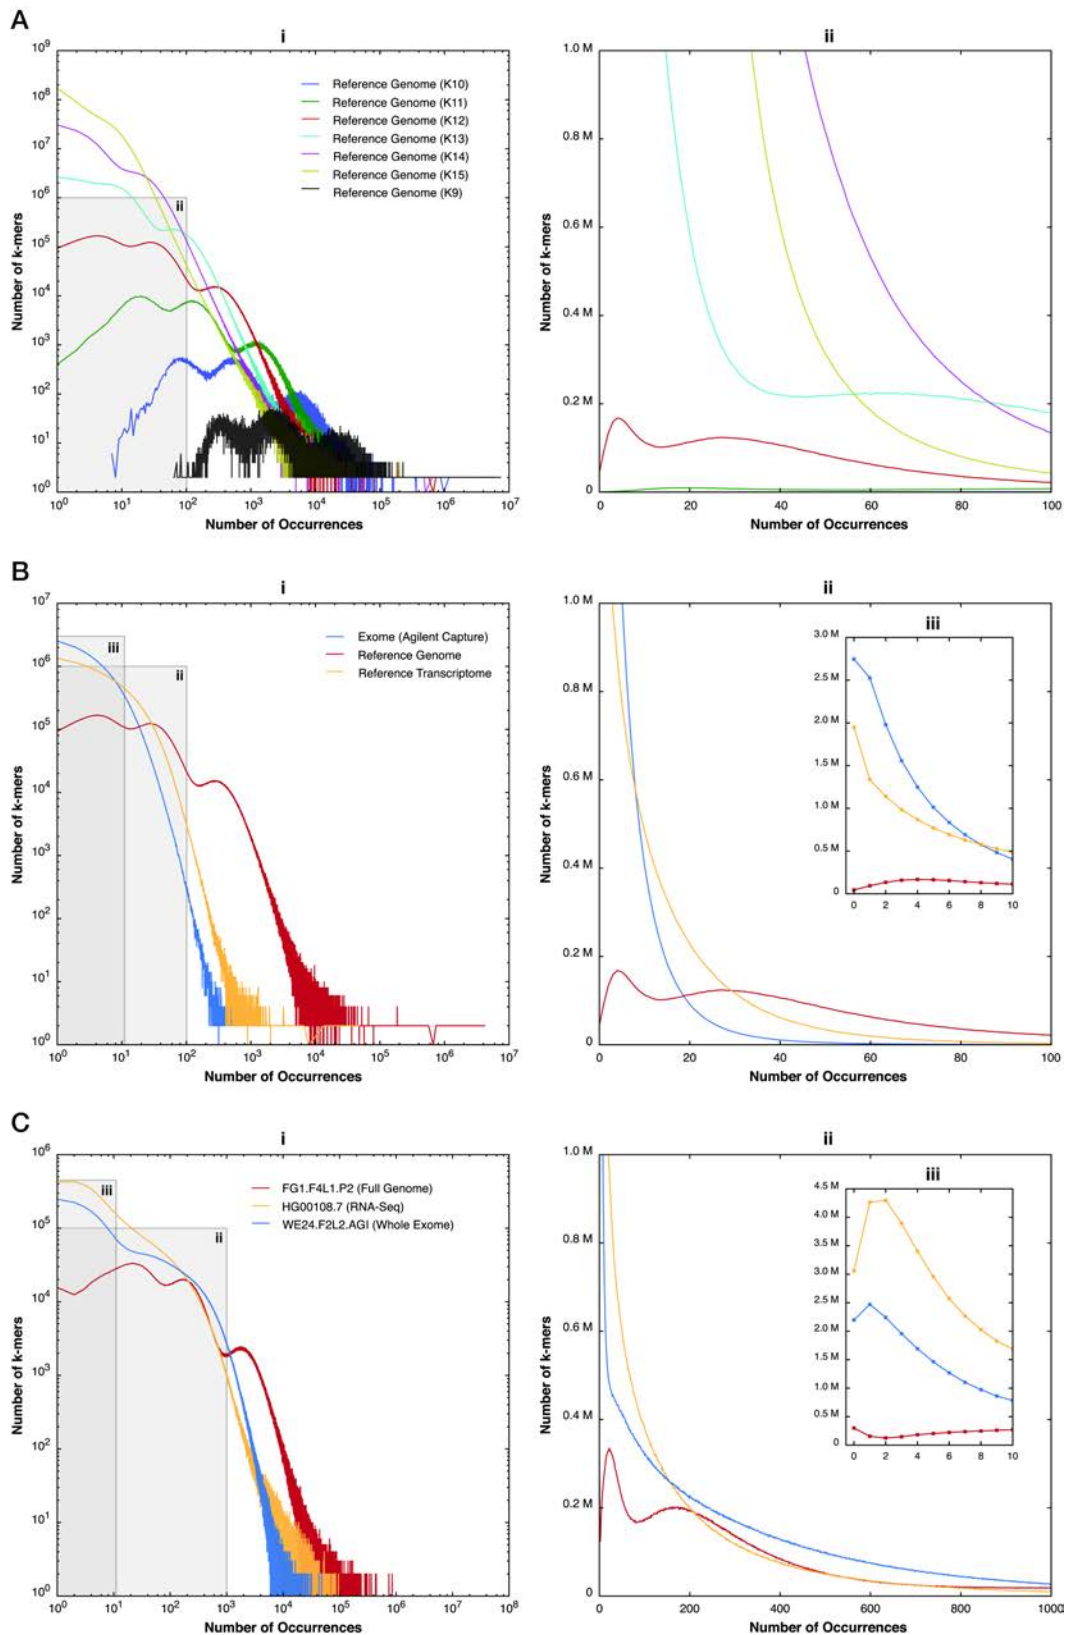

**Supplementary Figure 3 – The  $k$ -mer spectrum on human sequencing data. A)** The  $k$ -mer spectrum of the human reference genome (hg19) for  $k$  sizes ranging from 9 to 15, coloured accordingly. The full spectrum is depicted in panel **i** (left panel), and two zoomed in plots (**ii** and **iii**) are provided on the right. **B)** The  $k$ -mer spectrum of genome, exome, and transcriptome reference sequences. The  $k$  size 12 is used to generate these profiles. **C)** The  $k$ -mer spectrum of whole genome sequencing, whole exome sequencing and RNA-Seq data. The  $k$  size 12 is used to generate these profiles. Different NGS data types are indicated in different colours.

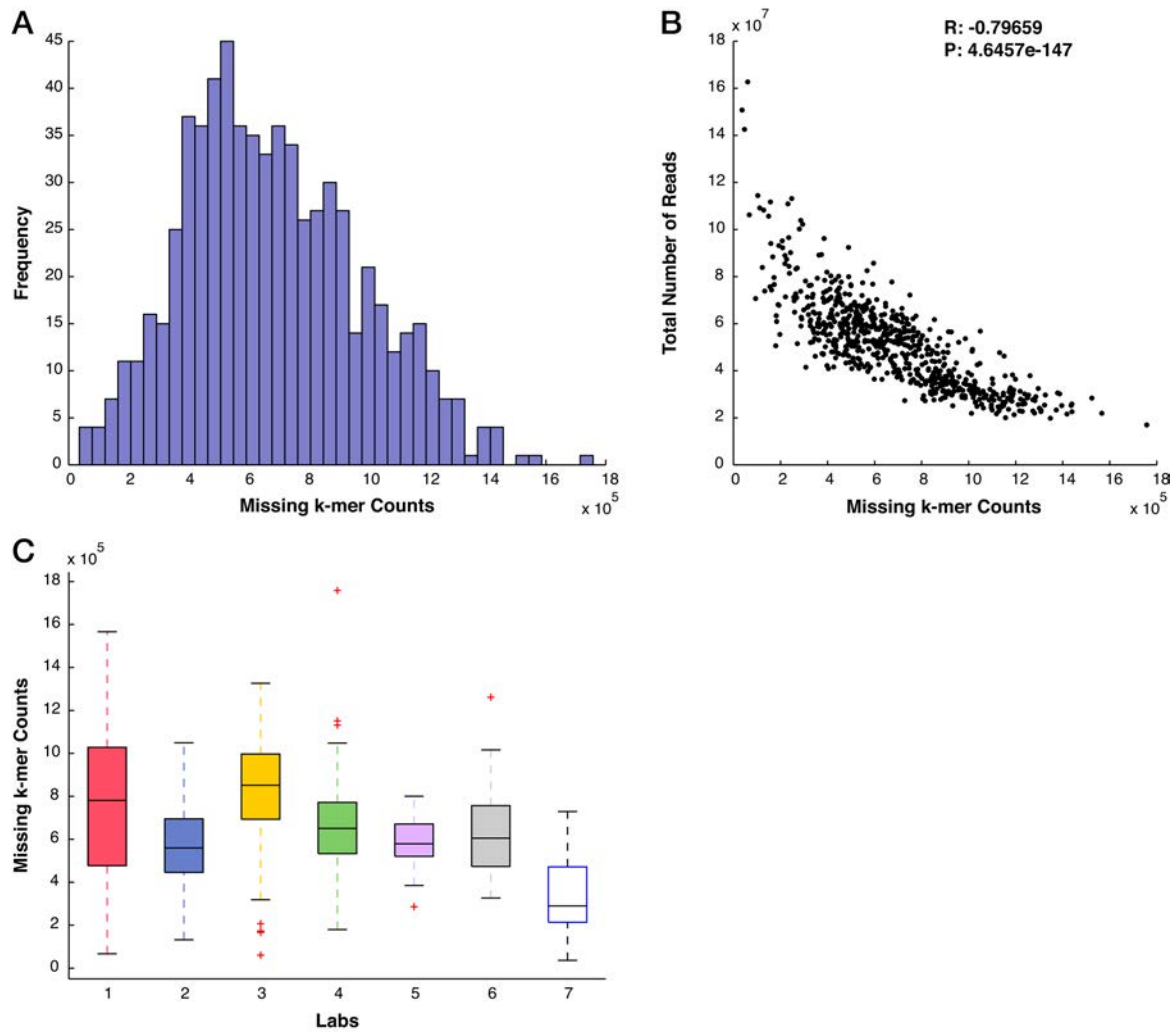

**Supplementary Figure 4 - The nullomers distribution in *k*-mer spectrum of RNA-Seq data.** **A)** Histogram of the total number of missing *k*-mers (*k*-mers with frequency of zero) across 665 RNA-Seq data. **B)** Scatter plot of the total number of missing *k*-mers versus the total number of reads per sample. **C)** Box plot of the total number of missing *k*-mers grouped according to the sequencing laboratories.

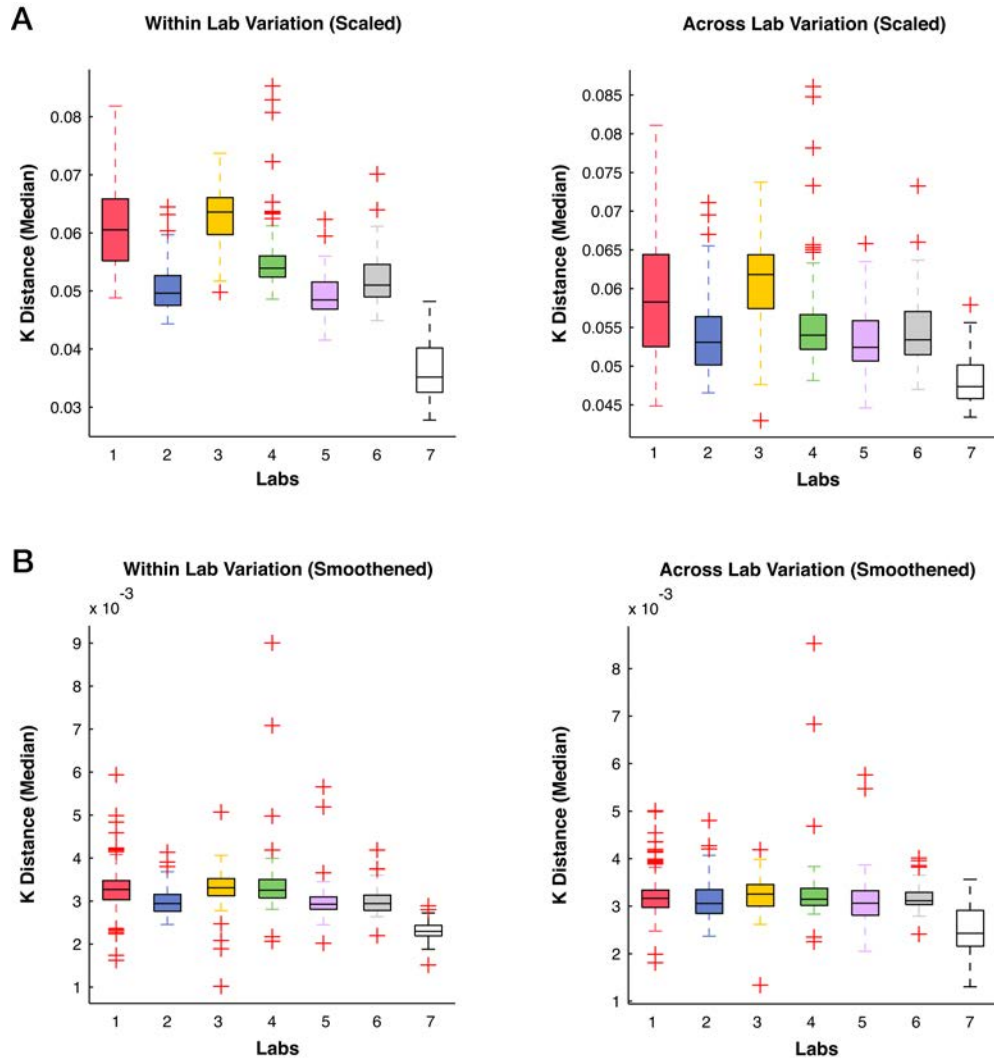

**Supplementary Figure 5 – The variation between *k*-mer distances in RNA-Seq data. A)** Box plots of the pairwise distance measures, **scaled only**, between samples sequenced in the same laboratory (left panel) or different laboratories (right panel). The distances are grouped for samples based on their sequencing laboratories and coloured accordingly. **B)** Box plots of the pairwise distance measures, **scaled and smoothed**, between samples sequenced in the same laboratory (left panel) or different laboratories (right panel). The distances are grouped for samples based on their sequencing laboratories and coloured accordingly.

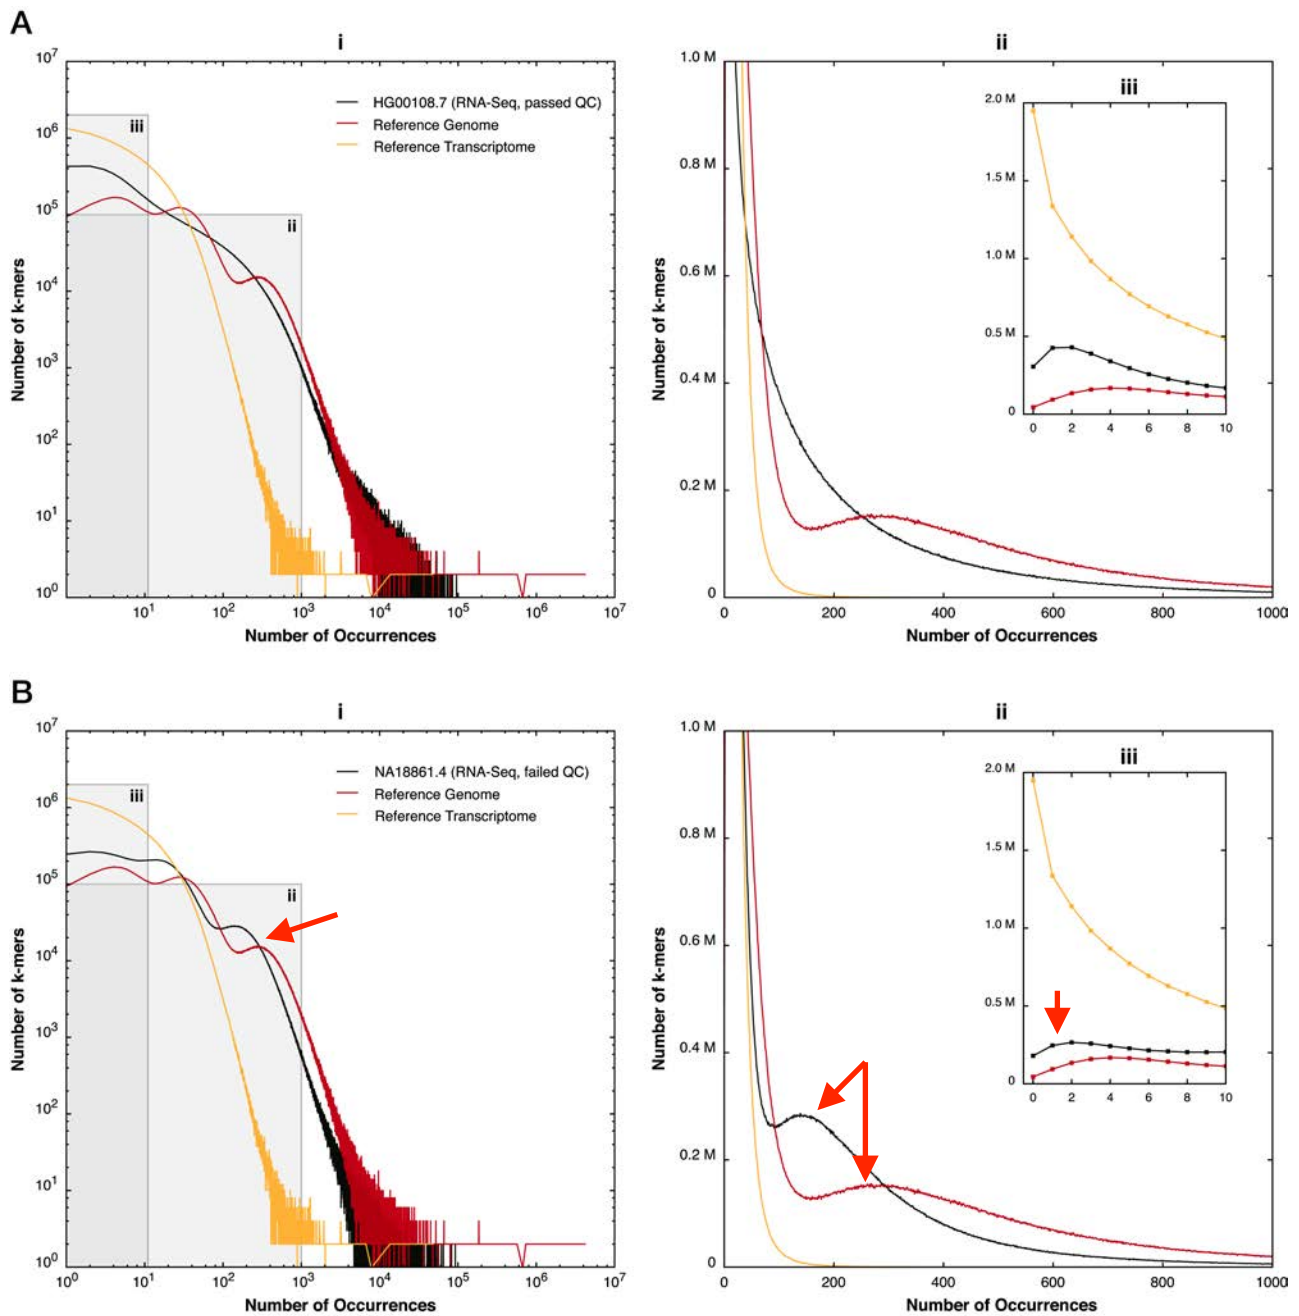

**Supplementary Figure 6 – Data quality influences the complexity of the *k*-mer spectrum of RNA-Seq data. A)** The *k*-mer spectrum of HG00108.7 sample that passed all QC measures for *k* size 12. The full spectrum is depicted in panel i (left panel), and two zoomed in plots (ii and iii) are provided on the right. **B)** The *k*-mer spectrum of NA18861.4 sample that did not pass QC measures for *k* size 12. This sample has severe contamination of genomic DNA. Both datasets have comparable number of sequencing reads.



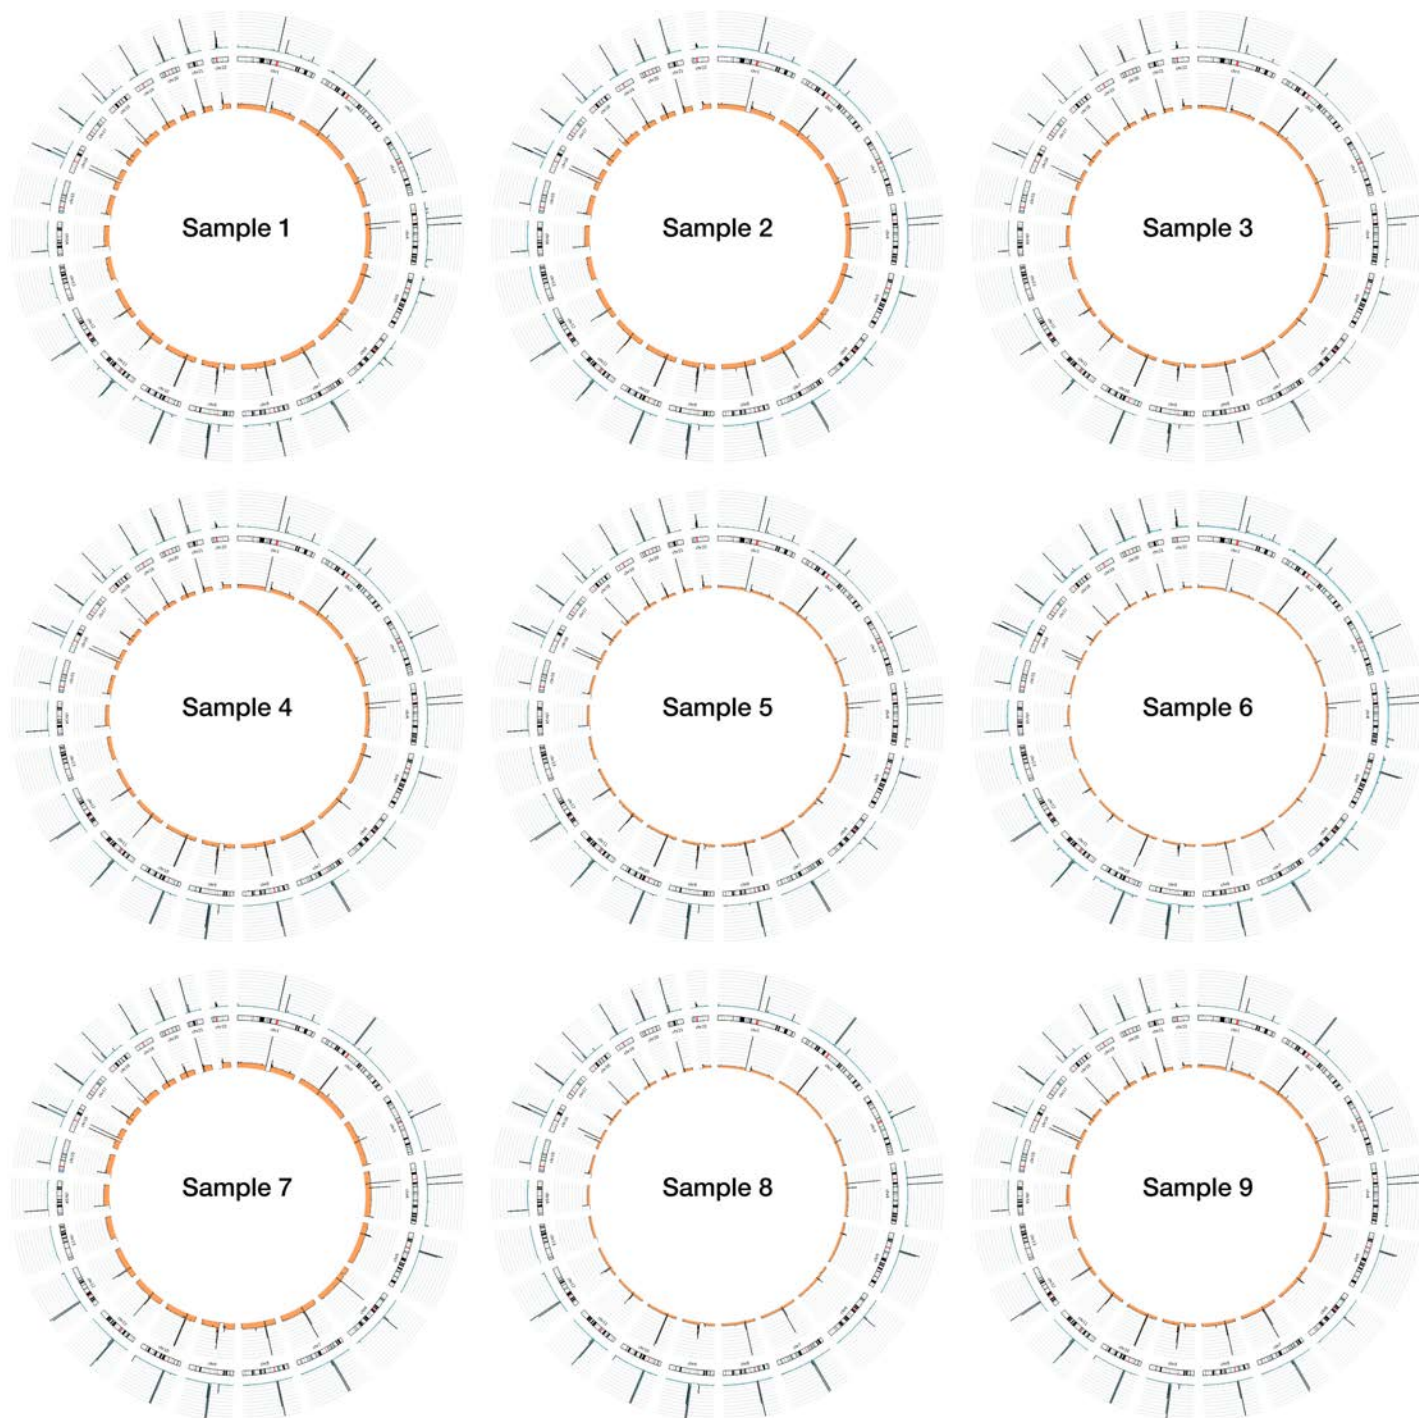

**Supplementary Figure 7 - Genome-wide coverage of discordant reads in WGS data.** Circos plots depict the overall coverage of discordant reads across all chromosomes for samples prepared using the first protocol (inner circles, in orange) and second protocol (outer circles, in blue). Coverage expectedly peaks at most centromeres. Datasets from each individual are merged and labelled accordingly.

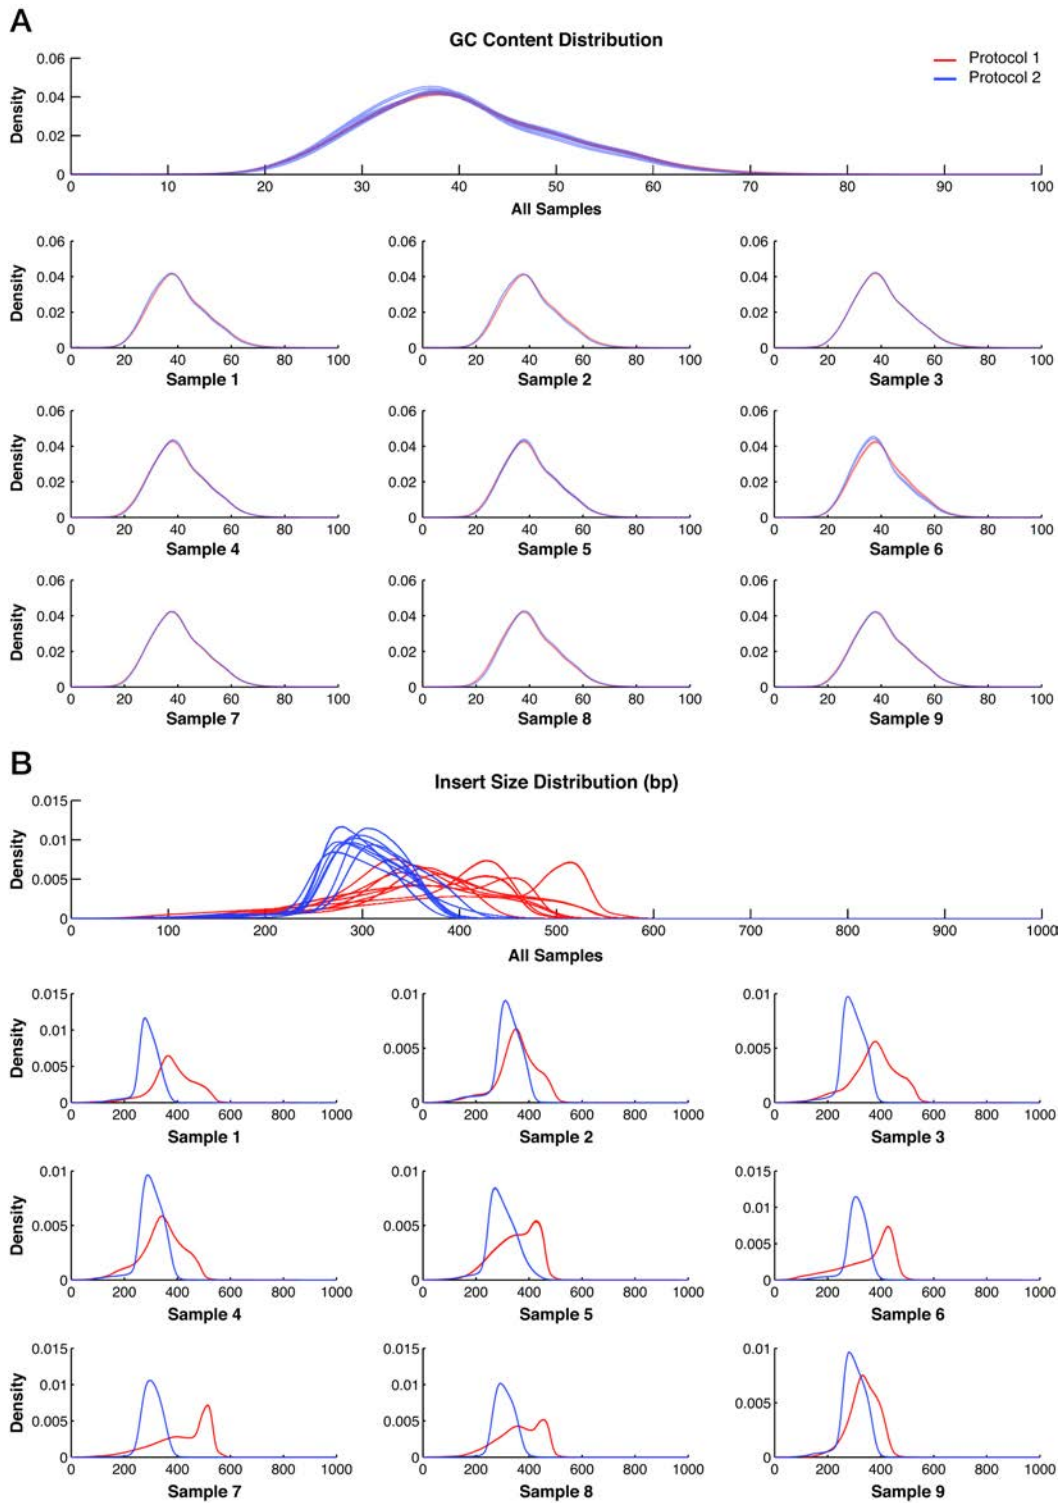

**Supplementary Figure 8 – GC-content and insert size distributions in WGS data. A)** The distribution of GC-content per read, grouped according to the choice of library preparation protocol (protocol one in red and protocol two in blue). Distribution for samples from each individual is provided. **B)** The distribution of the estimated insert sizes, grouped according to the choice of library preparation protocol (protocol one in red and protocol two in blue).

**A**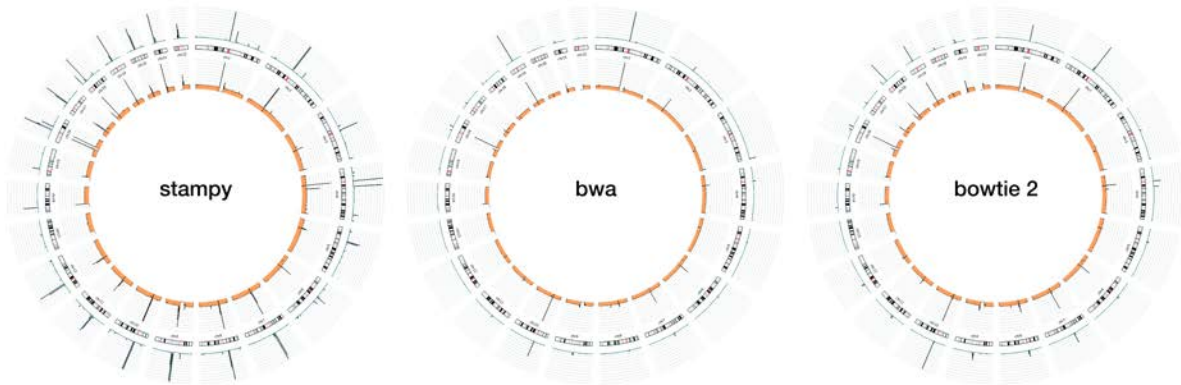**B**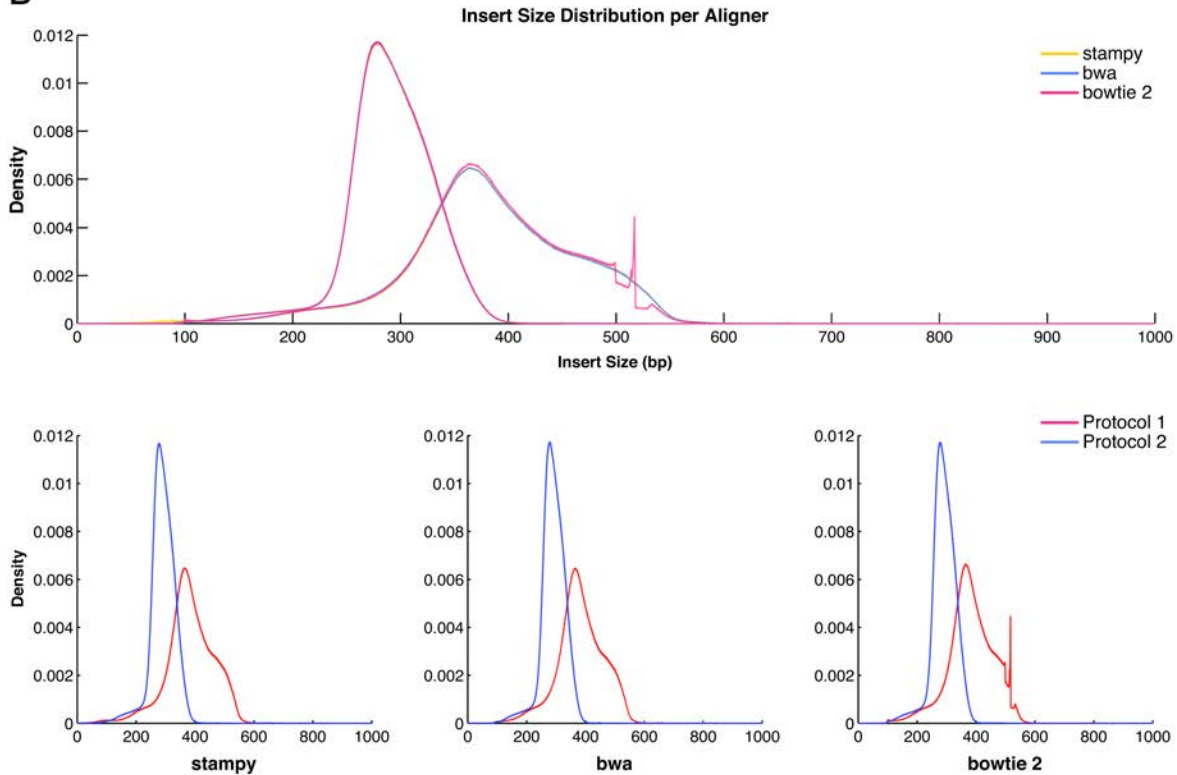

**Supplementary Figure 9 - The influence of aligners in the rate of discordant reads and insert size distribution of WGS data. A)** Circos plots depict the overall coverage of discordant reads across all chromosomes for samples prepared using the first protocol (inner circles, in orange) and second protocol (outer circles, in blue). Each panel provides the result obtained using different aligners (stampy, bwa, and bowtie 2, respectively). Datasets from each individual are merged and labelled accordingly. **B)** The distribution of the estimated insert sizes, grouped according to the choice of genome aligner (stampy, bwa, and bowtie 2). Lower panel shows the insert size distribution per individual aligner, coloured based on the choice of library preparation protocol (protocol one in red and protocol two in blue).



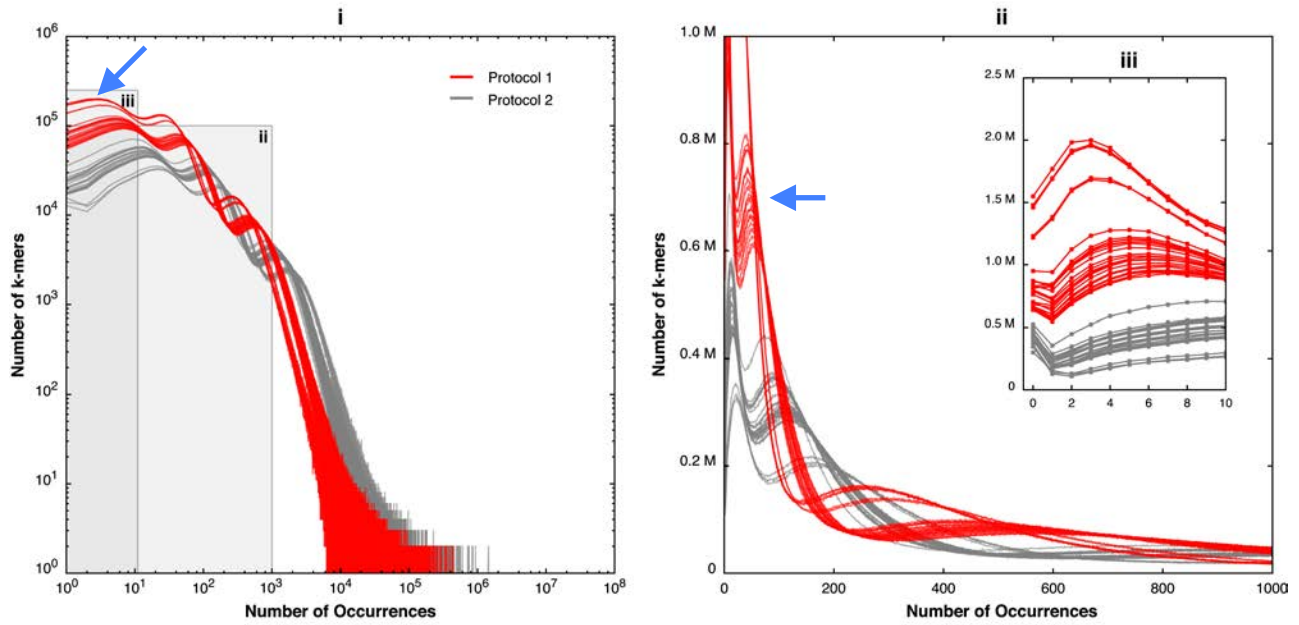

**Supplementary Figure 10 - Data quality influences the complexity of the  $k$ -mer spectrum of WGS data.** The  $k$ -mer spectrum ( $k = 12$ ) of samples, prepared using the library preparation protocol one (red) or two (grey). The full spectrum is depicted in panel i (left panel), and two zoomed in plots (ii and iii) are provided on the right.

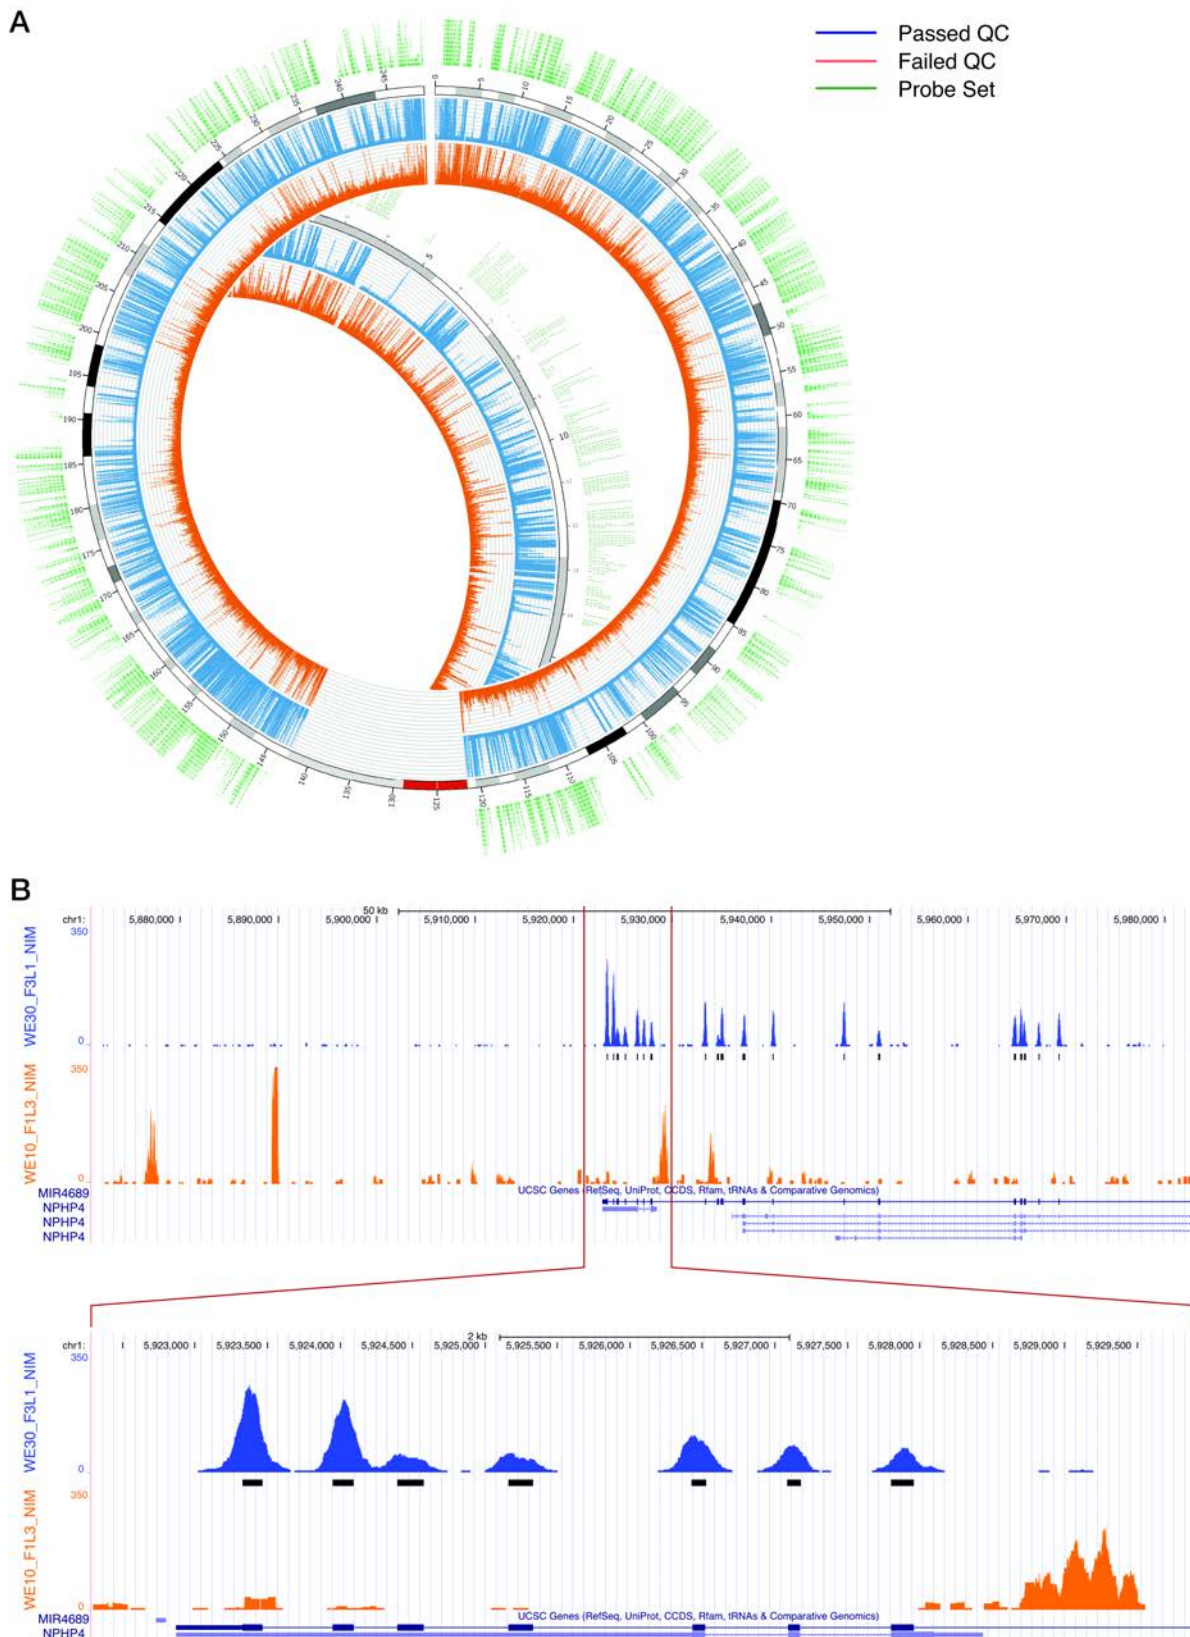

**Supplementary Figure 11 – Capture performance in WES data. A)** Circos plot depicts the coverage on chromosome 1 for good (blue) and poor (orange) exome capture experiment. The location of designed probes in Nimblegen capture kit are indicated on the outer circle in green. **B)** UCSC genome browser view of the chr1:5,880,000 – 5,980,000 covering a region on *NPHP4* gene for good and poorly captured whole exome sequencing data. Exons are indicated in black bars and the data coverage is illustrated in blue and orange for two WES data with good and poor capture, respectively.

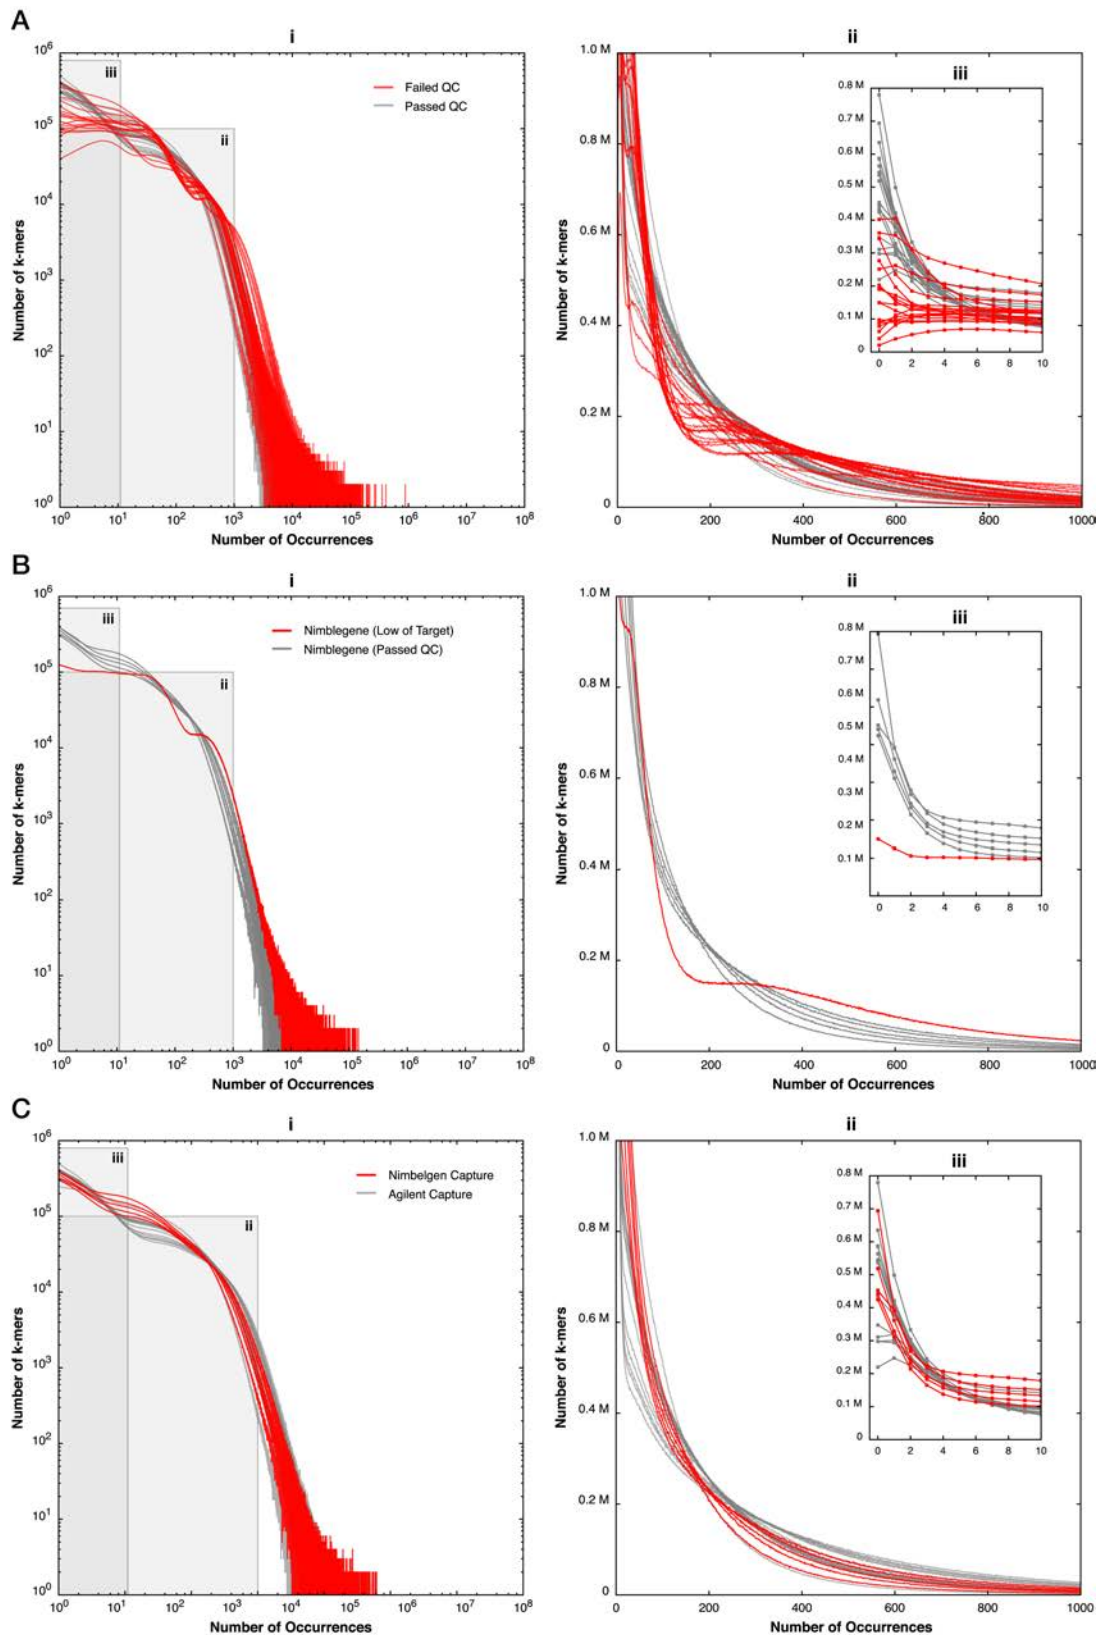

**Supplementary Figure 12 - Data quality influences the complexity of the  $k$ -mer spectrum in WES data.** **A)** The  $k$ -mer spectrum ( $k = 12$ ) of samples with poor (red) or good (grey) capture performance. The full spectrum is depicted in panel **i** (left panel), and two zoomed in plots (**ii** and **iii**) are provided on the right. **B)** The  $k$ -mer spectrum of a failed sample along with successful captures using Nimblegen capture kit. **C)** The  $k$ -mer spectrum of samples that passed all QC measures grouped according to the choice of exome capture kit (Nimblegen in red and Agilent SureSelect in grey).

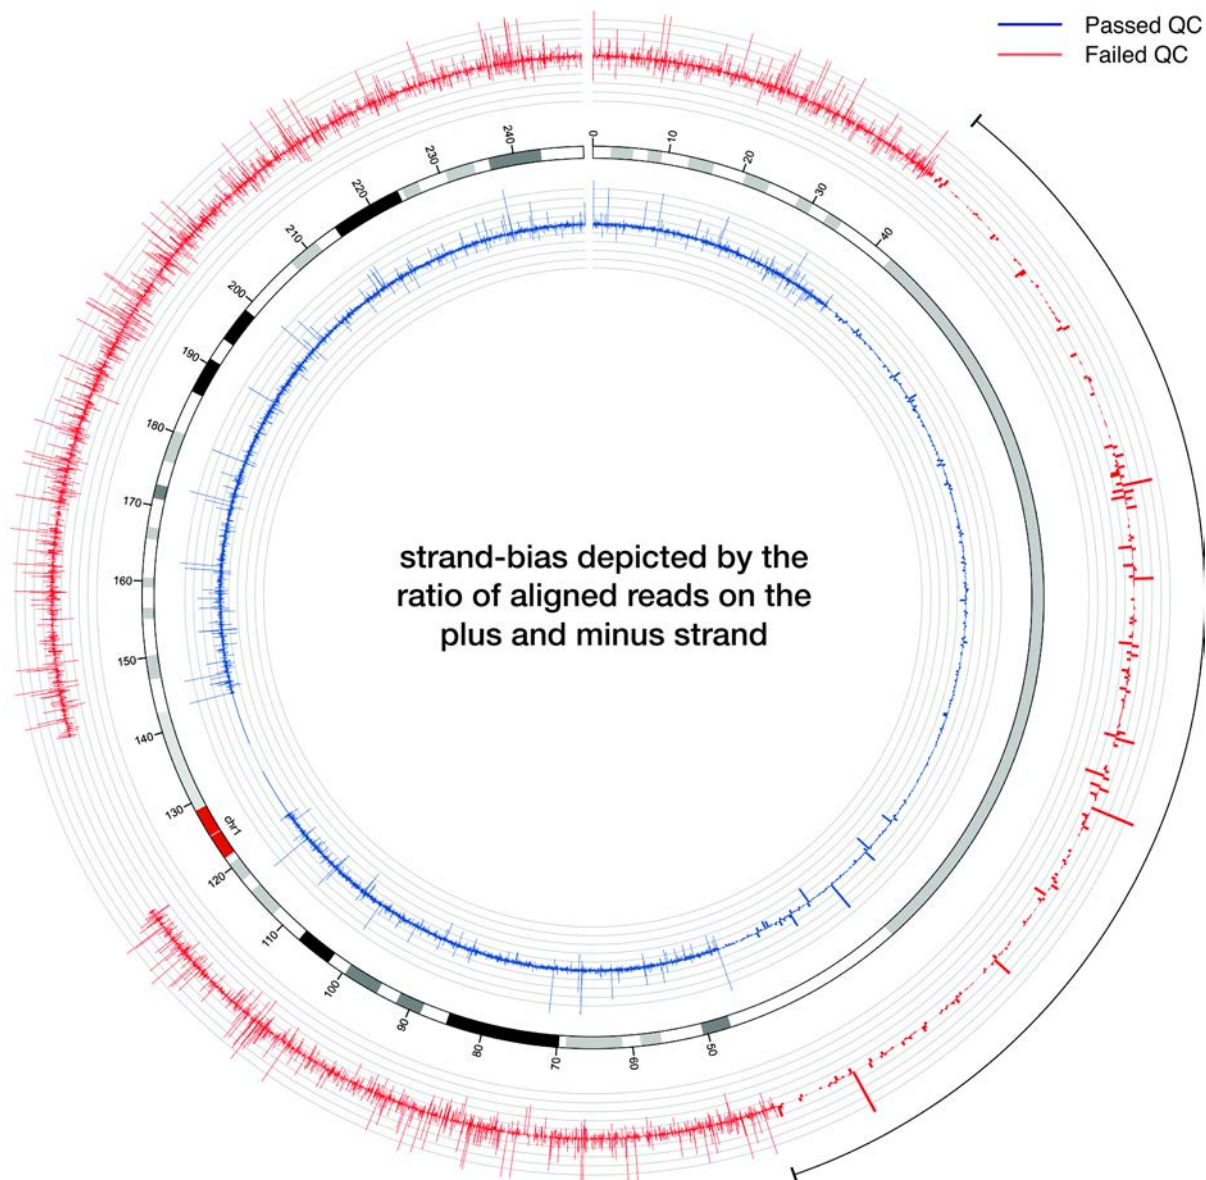

**Supplementary Figure 13 - Strand-biased coverage in WES data is reflected in its *k*-mer spectrum.** Circos plot illustrates the ratio between the number of reads that map to the plus or minus strand of the human reference genome. The data from WE10\_F1L3\_NIM with extreme duplication rate and subsequently imbalanced coverage of plus and minus strand is plotted on the outer circle in red. The result of another WES that passed all QC measures, with comparable number of reads, is plotted in the inner circle in blue. This plot illustrates the result on chromosome 1, partially zoomed in between coordinates 40 and 50 Mb.



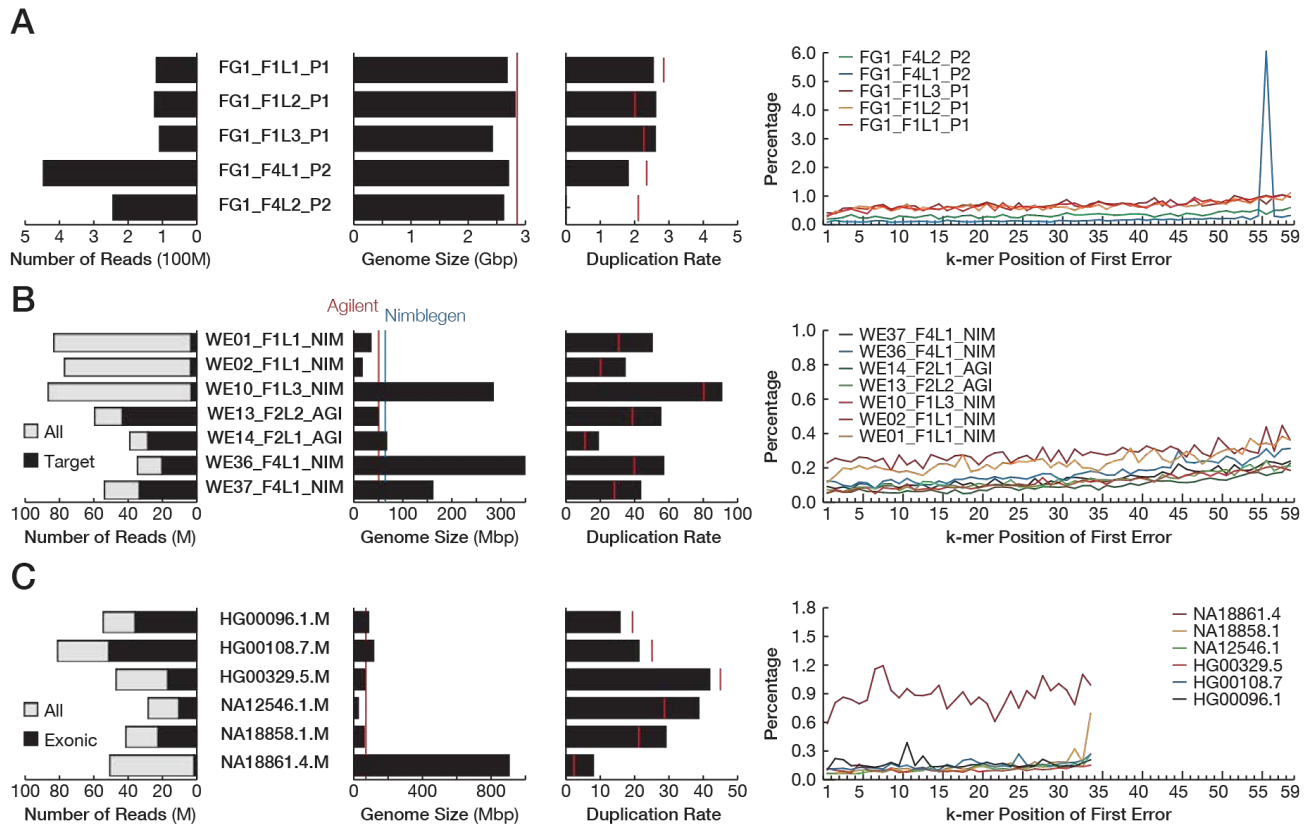

**Supplementary Figure 14 - Detecting problematic samples using SGA. A)** Total number of reads and estimated genome size and duplication rate of WGS data from the first individual using SGA. Red lines depict the expected genome size (excluding gaps) and duplication rate of each dataset that is calculated after alignment to the reference genome. Line plots show the frequency of the  $k$ -mer position of the first error for each dataset. Errors are estimated based on rarity of  $k$ -mer frequencies. **B)** Total number of reads and number of on-target reads are depicted for selected WES datasets along with SGA-estimated genome sizes and duplication rates. Red line depicts the targeted genomic region of the Agilent capture kit and the blue line depicts the targeted genomic region of the Nimblegen capture kit. Small red lines depict duplication rate of each dataset that is calculated after alignment to the reference genome. Line plots show the frequency of the  $k$ -mer position of the first error for each whole-exome dataset. **C)** Total number of reads and number of exonic reads in a set of RNA-Seq data along with SGA-estimated genome sizes and duplication rates. Red lines depict the total size of all exons in the human reference genome and duplication rate of each dataset that is calculated after alignment to the reference genome. Line plots show the frequency of the  $k$ -mer position of the first error for each of RNA-Seq datasets.

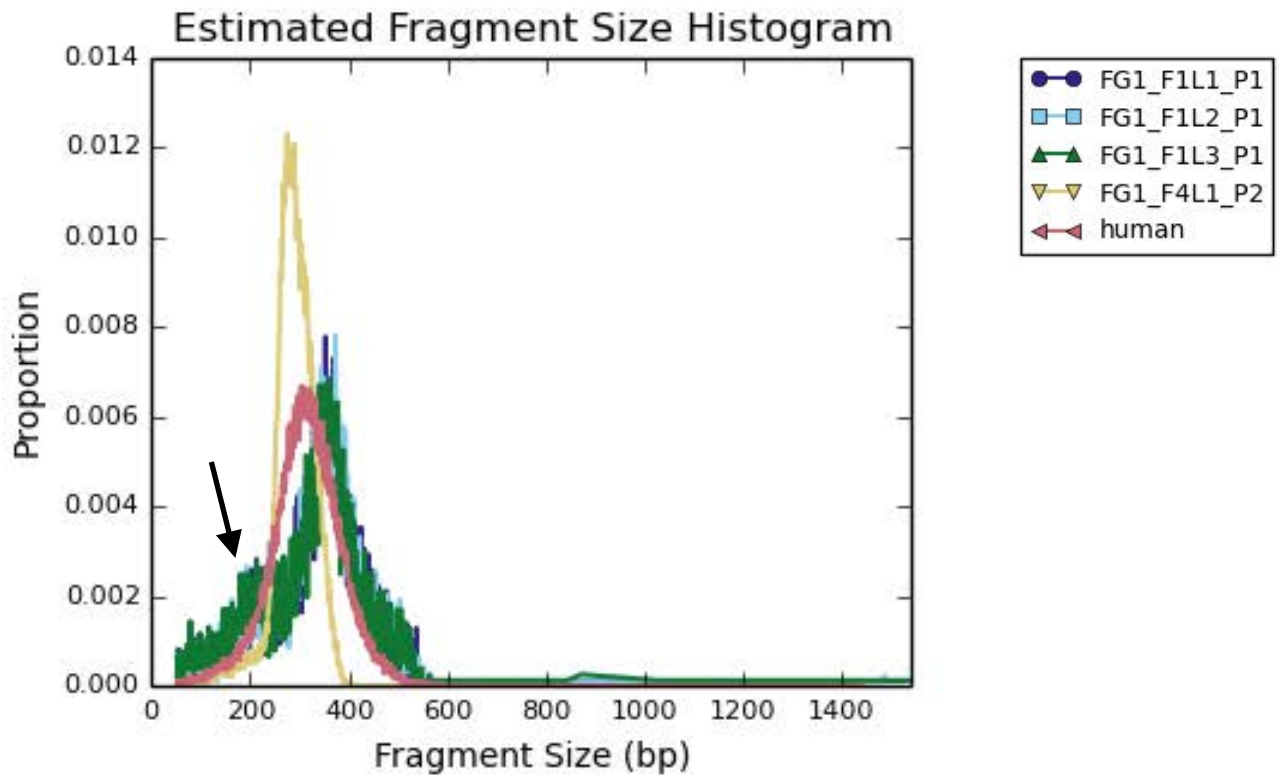

**Supplementary Figure 15 – Estimated insert size distribution of WGS data using SGA.** Fragment sizes are estimated by SGA-Preqc for a subset of WGS data. Green, light blue and dark blue lines depicted samples that are prepared using the first protocol (FG1\_F1L1\_P1, FG1\_F1L2\_P1 and FG1\_F1L3\_P1). Red and yellow lines depict samples that are prepared using the second protocol (FG1\_F4L1\_P2 and FG1\_F4L2\_P2). The arrow indicates the extra mode that makes the insert size distribution of samples from the first protocol bimodal.

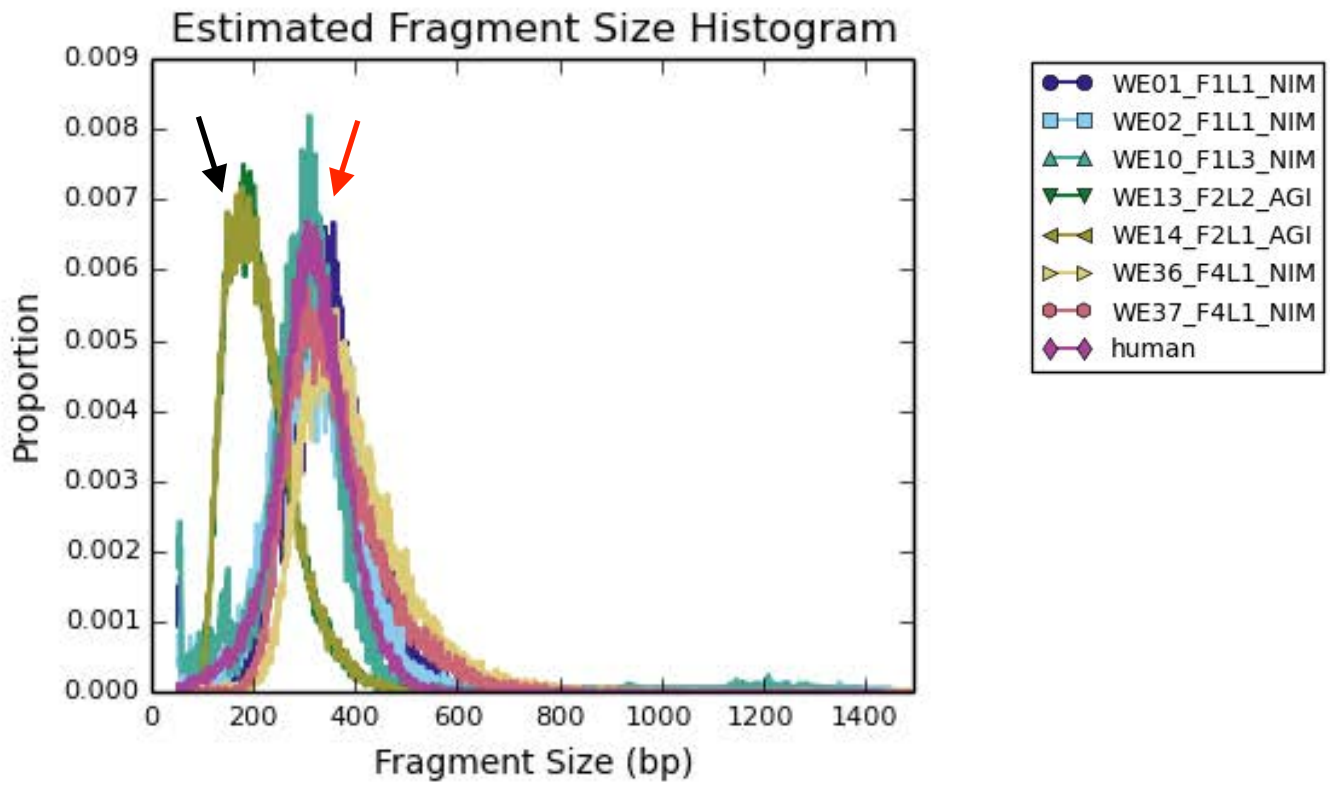

**Supplementary Figure 16 – Estimated insert size distribution of WES data using SGA.** Fragment sizes are estimated by SGA-Preqc for a subset of WES data. The black arrow indicates samples that are prepared using the Agilent SureSelect capture kit. The red arrow indicates samples that are prepared using the Nimblegen capture kit.

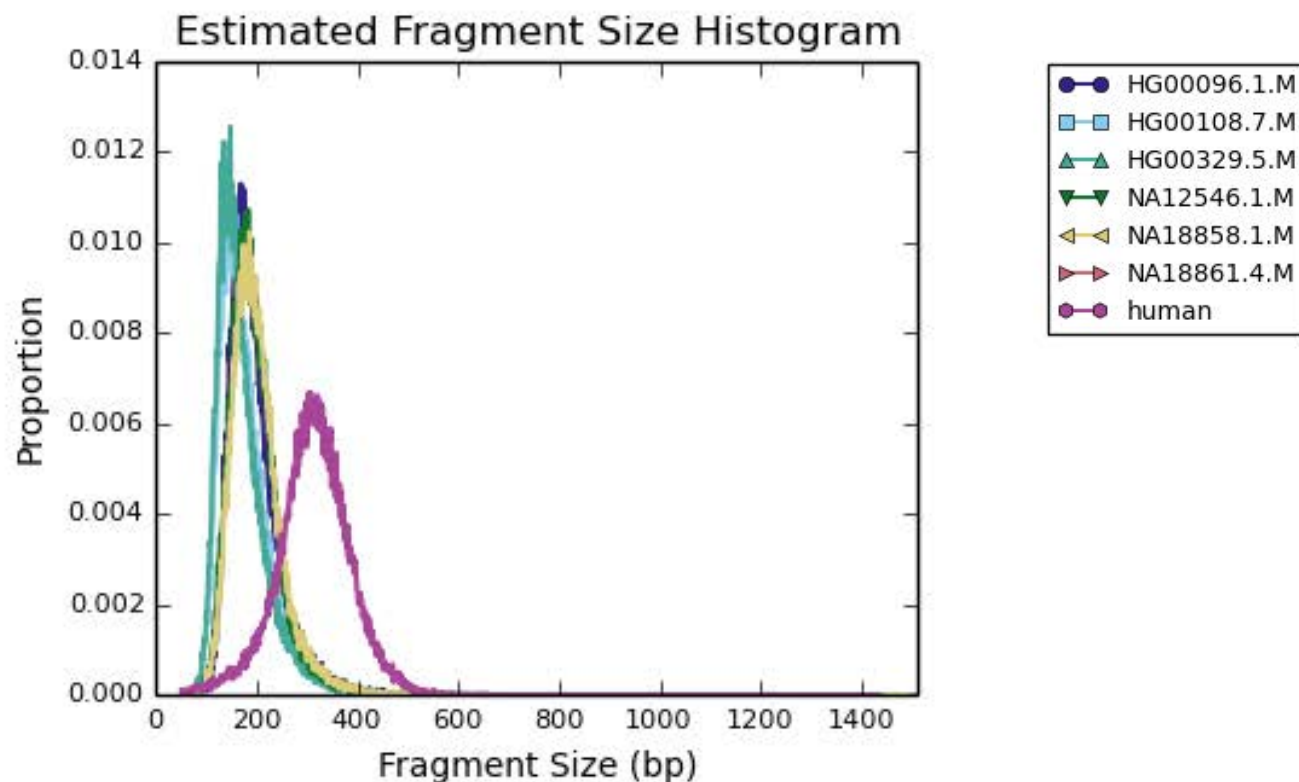

**Supplementary Figure 17 - Estimated insert size distribution of RNA-Seq data using SGA.** Fragment sizes are estimated by SGA-Preqc for a subset of RNA-Seq data. The WGS human data (purple), provided by SGA, is included as a reference.



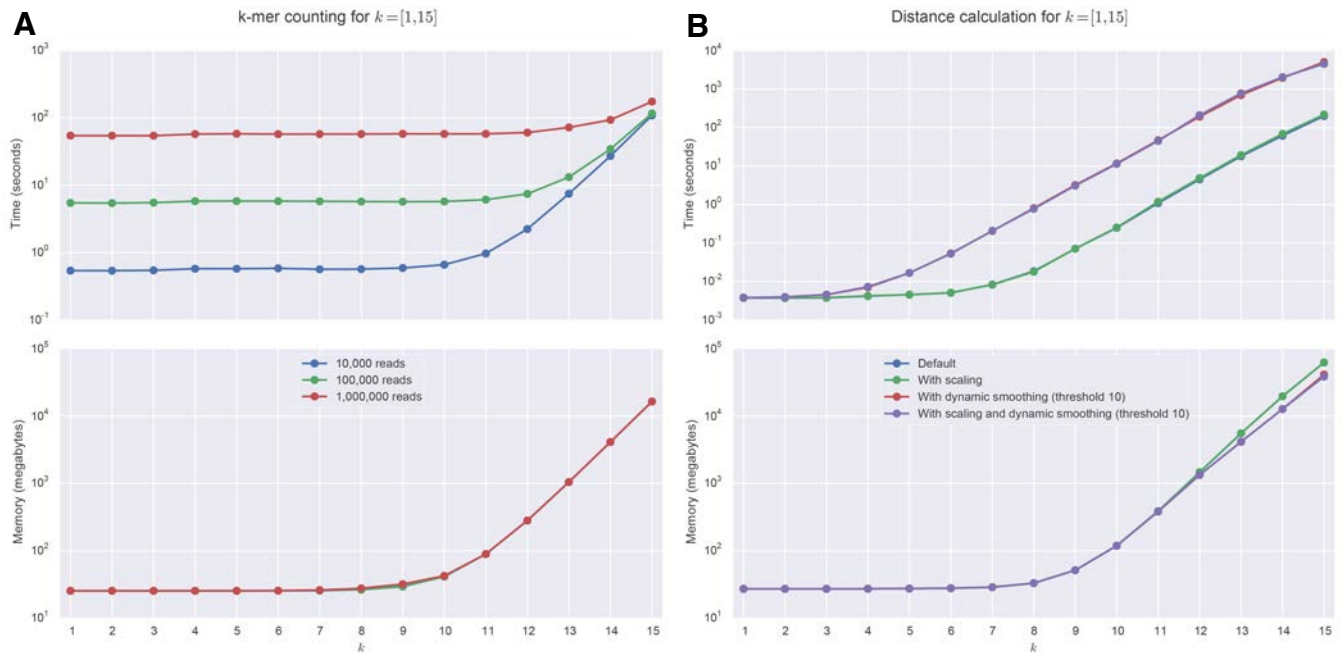

**Supplementary Figure 18 – Speed and memory usage of kMer in generating and comparing profiles. A)** Plots depict the time (second) and memory (MB) needed to generate  $k$ -mer profiles for various sizes ( $k = 1:15$ ). **B)** Plots depict the time and memory needed to perform a pairwise comparison. During the pairwise comparisons, the process is repeated based on different use of scaling and smoothing functions. Datasets contain 10,000 to 1 million single-end reads of 100bp long. All tasks were carried out on a cluster node with Intel Xeon E5540 at 2.53 GHz with 8 cores, although only one core is used by kMer. For the most up-to-date and detailed documentation on performance and best practices visit <http://kmer.readthedocs.org> and [www.lgtc.nl/kMer](http://www.lgtc.nl/kMer).

## References

1. Chor, B., Horn, D., Goldman, N., Levy, Y. and Massingham, T. (2009) Genomic DNA k-mer spectra: models and modalities. *Genome biology*, **10**, R108.
2. Csuros, M., Noe, L. and Kucherov, G. (2007) Reconsidering the significance of genomic word frequencies. *Trends in genetics : TIG*, **23**, 543-546.
3. Hariharan, R., Simon, R., Pillai, M.R. and Taylor, T.D. (2013) Comparative analysis of DNA word abundances in four yeast genomes using a novel statistical background model. *PloS one*, **8**, e58038.
4. Herold, J., Kurtz, S. and Giegerich, R. (2008) Efficient computation of absent words in genomic sequences. *BMC bioinformatics*, **9**, 167.
5. Acquisti, C., Poste, G., Curtiss, D. and Kumar, S. (2007) Nullomers: really a matter of natural selection? *PloS one*, **2**, e1022.
6. Josse, J., Kaiser, A.D. and Kornberg, A. (1961) Enzymatic synthesis of deoxyribonucleic acid. VIII. Frequencies of nearest neighbor base sequences in deoxyribonucleic acid. *The Journal of biological chemistry*, **236**, 864-875.
7. Sved, J. and Bird, A. (1990) The expected equilibrium of the CpG dinucleotide in vertebrate genomes under a mutation model. *Proceedings of the National Academy of Sciences of the United States of America*, **87**, 4692-4696.
8. Subramanian, S. and Kumar, S. (2003) Neutral substitutions occur at a faster rate in exons than in noncoding DNA in primate genomes. *Genome Res*, **13**, 838-844.
9. Kusters, W.A. and Laros, J.F.J. (2008) In Bramer, M., Coenen, F. and Petridis, M. (eds.), *Research and Development in Intelligent Systems XXIV*. Springer London, pp. 293-303.
10. Lappalainen, T., Sammeth, M., Friedlander, M.R., t Hoen, P.A.C., Monlong, J., Rivas, M.A., Gonzalez-Porta, M., Kurbatova, N., Griebel, T., Ferreira, P.G. *et al.* (2013) Transcriptome and genome sequencing uncovers functional variation in humans. *Nature*, **advance online publication**.
11. t Hoen, P.A.C., Friedlander, M.R., Almlof, J., Sammeth, M., Pulyakhina, I., Anvar, S.Y., Laros, J.F.J., Buermans, H.P.J., Karlberg, O., Brannvall, M. *et al.* (2013) Reproducibility of high-throughput mRNA and small RNA sequencing across laboratories. *Nat Biotech*, **advance online publication**.
12. Caporaso, J.G., Lauber, C.L., Costello, E.K., Berg-Lyons, D., Gonzalez, A., Stombaugh, J., Knights, D., Gajer, P., Ravel, J., Fierer, N. *et al.* (2011) Moving pictures of the human microbiome. *Genome biology*, **12**, R50.
